# Supplementary material for: Last Interglacial sea-level proxies in the western Mediterranean
Source: Copernicus journal article supplement (doi:10.5194/essd-13-4485-2021), 2021-09-16
Supplement: Supplementary file 1 [file essd-13-4485-2021-supplement.pdf]

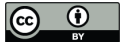

*Supplement of*

## **Last Interglacial sea-level proxies in the western Mediterranean**

**Ciro Cerrone et al.**

*Correspondence to:* [Ciro Cerrone \(ciro.cerrone@dst.unipi.it\)](mailto:ciro.cerrone@dst.unipi.it)

The copyright of individual parts of the supplement might differ from the article licence.

## Supplementary Table

Summary of sea-level datapoints and dated samples / chronostratigraphic constraints for the Western Mediterranean. **Acronyms:** Type of datapoints: SLI = Sea Level Index point; TLI = Terrestrial Limiting; MLI = Marine Limiting. RSL Indicator: MT = Marine Terrace; BRK = Beach deposit or beachrock; IMF = Shallow or intertidal marine fauna; LIT = Upper limit of Lithophaga boreholes; LAG = Lagoonal deposit; BSD = Beach swash deposit; COR = Single Coral; NTC = Tidal notch; FOR = Foreshore deposits; BIO = Bioerosional and erosional markers on limestone cliff; BRI = Beach Ridge; ARI = Lithophyllum byssoides algal rims. In the age field, \* denotes ages that were rejected by the original authors; > denotes that the age is "Older than", while < denotes that the age is "Younger than".

| WALIS ID                 | Latitude Longitude     | Site                         | Type of datapoint | RSL Indicator | Elevation (m) | Paleo RSL (m) | Dating (Original ID)                        | Age (ka or MIS) | Quality (RSL, Age) | Reference(s)                              |
|--------------------------|------------------------|------------------------------|-------------------|---------------|---------------|---------------|---------------------------------------------|-----------------|--------------------|-------------------------------------------|
| <b>Spain (Andalucía)</b> |                        |                              |                   |               |               |               |                                             |                 |                    |                                           |
| 765                      | 36.3313<br>-6.1589     | Torre del Puerco             | SLI               | MT            | 8.7±1.7       | 8.1±2.6       | STRAT (MIS 5e in the Gibraltar Strait Area) | MIS 5e          | 1,3                | Zazo et al., 1999                         |
| 764                      | 36.2251<br>-6.0618     | Conil-Trafalgar              | SLI               | MT            | 13±2.6        | 12.4±3.3      | STRAT (MIS 5e in the Gibraltar Strait Area) | MIS 5e          | 1,3                | Zazo et al., 1999                         |
| 763                      | 36.1703<br>-5.8894     | Zahara                       | SLI               | MT            | 14±2.8        | 13.4±3.4      | STRAT (MIS 5e in the Gibraltar Strait Area) | MIS 5e          | 1,3                | Zazo et al., 1999                         |
| 762                      | 36.0841<br>-5.8022     | Cabo gracia                  | SLI               | MT            | 13±2.6        | 12.5±3.2      | STRAT (MIS 5e in the Gibraltar Strait Area) | MIS 5e          | 1,3                | Zazo et al., 1999                         |
| 761                      | 36.0751<br>-5.7519     | Bolonia - Punta Paloma       | SLI               | MT            | 13.5±2.7      | 13±3.3        | STRAT (MIS 5e in the Gibraltar Strait Area) | MIS 5e          | 1,3                | Zazo et al., 1999                         |
| 760                      | 36.023<br>-5.5687      | Tarifa                       | SLI               | MT            | 19±3.8        | 18.9±3.9      | STRAT (MIS 5e in the Gibraltar Strait Area) | MIS 5e          | 1,3                | Zazo et al., 1999                         |
| 759                      | 36.0805<br>-5.4313     | Algeciras 2                  | SLI               | MT            | 13±2.6        | 12.9±2.8      | STRAT (MIS 5e in the Gibraltar Strait Area) | MIS 5e          | 1,3                | Zazo et al., 1999                         |
| 758                      | 36.0958<br>-5.4591     | Algeciras 1                  | SLI               | MT            | 10±2          | 9.9±2.2       | STRAT (MIS 5e in the Gibraltar Strait Area) | MIS 5e          | 1,3                | Zazo et al., 1999                         |
| 757                      | 36.1057<br>-5.3352     | Gibraltar                    | SLI               | MT            | 5.3±1.1       | 5.1±1.4       | STRAT (MIS 5e in the Gibraltar Strait Area) | MIS 5e          | 1,3                | Zazo et al., 1999                         |
| 756                      | 36.1865<br>-5.3379     | La Linea                     | SLI               | MT            | 6.5±1.3       | 6.4±1.6       | STRAT (MIS 5e in the Gibraltar Strait Area) | MIS 5e          | 1,3                | Zazo et al., 1999                         |
| 755                      | 36.5071<br>-4.8502     | Marbella                     | SLI               | MT            | 2±0.4         | 1.9±1         | STRAT (MIS 5e in the Gibraltar Strait Area) | MIS 5e          | 1,3                | Zazo et al., 1999                         |
| 754                      | 36.5278<br>-4.6292     | Fuengirola                   | SLI               | MT            | 2±0.4         | 1.9±1         | STRAT (MIS 5e in the Gibraltar Strait Area) | MIS 5e          | 1,3                | Zazo et al., 1999                         |
| 753                      | 36.6104<br>-4.4837     | Torremolinos                 | SLI               | MT            | 2±0.4         | 1.9±1         | STRAT (MIS 5e in the Gibraltar Strait Area) | MIS 5e          | 1,3                | Zazo et al., 1999                         |
| 752                      | 36.7155<br>-4.3176     | El Candado                   | SLI               | MT            | 1.5±0.3       | 1.4±1         | STRAT (MIS 5e in the Gibraltar Strait Area) | MIS 5e          | 1,3                | Zazo et al., 1999                         |
| 4001                     | 36.713164<br>-4.338721 | Cerro Juan                   | SLI               | BRK           | 2±0.9         | 2.1±1.1       | ESR (E-92)                                  | 117.3±23.4      | 2,3                | Brückner and Radtke (1986)                |
| <b>Spain (Murcia)</b>    |                        |                              |                   |               |               |               |                                             |                 |                    |                                           |
| 750                      | 37.45904<br>-1.47611   | Cope Basin - Point 11 Unit D | SLI               | BRK           | 3.8±1.6       | 4±1.7         | STRAT (Unit D - Cope Basin MIS 5e)          | MIS 5           | 1,3                | Bardají et al., 2015<br>Zazo et al., 2003 |

| WALIS ID                            | Latitude Longitude     | Site                                          | Type of datapoint | RSL Indicator | Elevation (m) | Paleo RSL (m) | Dating (Original ID)               | Age (ka or MIS) | Quality (RSL, Age) | Reference(s)                              |
|-------------------------------------|------------------------|-----------------------------------------------|-------------------|---------------|---------------|---------------|------------------------------------|-----------------|--------------------|-------------------------------------------|
| 749                                 | 37.46034<br>-1.47571   | Cope Basin - Point 10<br>Unit D               | SLI               | BRK           | 3.5±2.2       | 3.7±2.3       | STRAT (Unit D - Cope Basin MIS 5e) | MIS 5           | 1,3                | Bardají et al., 2015<br>Zazo et al., 2003 |
| 748                                 | 37.46175<br>-1.47514   | Cope Basin - Point 9<br>Unit D                | SLI               | BRK           | 3.8±1.3       | 4±1.4         | STRAT (Unit D - Cope Basin MIS 5e) | MIS 5           | 1,3                | Bardají et al., 2015<br>Zazo et al., 2003 |
| 747                                 | 37.46336<br>-1.47436   | Cope Basin - Point 8<br>Unit D                | SLI               | BRK           | 2.8±1.3       | 3±1.4         | STRAT (Unit D - Cope Basin MIS 5e) | MIS 5           | 1,3                | Bardají et al., 2015<br>Zazo et al., 2003 |
| 746                                 | 37.46472<br>-1.47312   | Cope Basin - Point 7<br>Unit D                | SLI               | BRK           | 4.5±1.1       | 4.7±1.3       | STRAT (Unit D - Cope Basin MIS 5e) | MIS 5           | 1,3                | Bardají et al., 2015<br>Zazo et al., 2003 |
| 745                                 | 37.46731<br>-1.47165   | Cope Basin - Point 6<br>Unit D                | SLI               | BRK           | 3±1.4         | 3.2±1.6       | STRAT (Unit D - Cope Basin MIS 5e) | MIS 5           | 1,3                | Bardají et al., 2015<br>Zazo et al., 2003 |
| 744                                 | 37.47374<br>-1.46843   | Cope Basin - Point 5<br>Unit D                | SLI               | BRK           | 4.3±1.3       | 4.5±1.4       | STRAT (Unit D - Cope Basin MIS 5e) | MIS 5           | 1,3                | Bardají et al., 2015<br>Zazo et al., 2003 |
| 743                                 | 37.47298<br>-1.46863   | Cope Basin - Point 4<br>Unit D                | SLI               | BRK           | 2.9±1.5       | 3.1±1.6       | STRAT (Unit D - Cope Basin MIS 5e) | MIS 5           | 1,3                | Bardají et al., 2015<br>Zazo et al., 2003 |
| 742                                 | 37.47436<br>-1.46725   | Cope Basin - Point 3<br>Unit D                | SLI               | BRK           | 7.5±1.1       | 7.7±1.3       | STRAT (Unit D - Cope Basin MIS 5e) | MIS 5           | 1,3                | Bardají et al., 2015<br>Zazo et al., 2003 |
| 741                                 | 37.47534<br>-1.46762   | Cope Basin - Point 2<br>Unit D                | SLI               | BRK           | 8.5±1.1       | 8.7±1.3       | STRAT (Unit D - Cope Basin MIS 5e) | MIS 5           | 1,3                | Bardají et al., 2015<br>Zazo et al., 2003 |
| 740                                 | 37.47626<br>-1.46713   | Cope Basin - Point 1<br>Unit D                | SLI               | BRK           | 7.5±1.1       | 7.7±1.3       | STRAT (Unit D - Cope Basin MIS 5e) | MIS 5           | 1,3                | Bardají et al., 2015<br>Zazo et al., 2003 |
| <b>Spain (Comunidad Valenciana)</b> |                        |                                               |                   |               |               |               |                                    |                 |                    |                                           |
| 751                                 | 38.159262<br>-0.635852 | La Marina - El Pinet<br>Section A, Terrace T8 | SLI               | BRK           | 5.5±0.3       | 5.7±0.7       | U-series (MP02-7)                  | MIS 5           | 5,3                | Goy et al., 2006<br>Mauz et al., 2012     |
|                                     |                        |                                               |                   |               |               |               | LUM (LV382)                        | 114±15          |                    |                                           |
| 738                                 | 38.159262<br>-0.635852 | La Marina - El Pinet<br>Section B, Terrace T8 | SLI               | BRK           | 8±0.3         | 8.2±0.7       | U-series (MP02-6)                  | MIS 5e          | 5,3                | Goy et al., 2006<br>Mauz et al., 2012     |
| 4079                                | 38.200564<br>-0.511227 | South of Torre de<br>Enmedio                  | SLI               | BRK           | 1.5±0.3       | 1.7±0.7       | U-series (E-32(b))                 | MIS 5           | 1,3                | Brückner, 1986                            |
|                                     |                        |                                               |                   |               |               |               | ESR (E-32-b)                       | 94±18.8         |                    |                                           |
| 4080                                | 38.234985<br>-0.513647 | Calabasi                                      | SLI               | BRK           | 3±0.6         | 3.2±0.9       | ESR (E-75-a)                       | 125±37.5        | 1,3                | Brückner, 1986                            |
|                                     |                        |                                               |                   |               |               |               | ESR (E-75-b)                       | 89±17.8         |                    |                                           |
| 4081                                | 38.352734<br>-0.409682 | Cabo de las Huertas                           | SLI               | BRK           | 2±0.4         | 2.2±0.8       | ESR (E-70)                         | 112±22.4        | 1,3                | Brückner, 1986                            |
| <b>Spain (Cataluña) – Figure 9</b>  |                        |                                               |                   |               |               |               |                                    |                 |                    |                                           |
| 4002                                | 40.839438<br>0.746244  | Morro del Gos                                 | SLI               | BRK           | 1.3±0.6       | 1.4±0.7       | ESR (E-63a)                        | 105±21          | 2,2                | Brückner and Radtke (1986)                |
|                                     |                        |                                               |                   |               |               |               | ESR (E-63b)                        | 137±27.4        |                    |                                           |
| 4082                                | 41.059166<br>1.16182   | Cabo de Salou<br>Cala Font                    | SLI               | BRK           | 3±0.6         | 3.2±0.8       | ESR (E-44(a))                      | 94±18.8         | 1,3                | Brückner, 1986                            |
|                                     |                        |                                               |                   |               |               |               | ESR (E-44(b))                      | 142±28.4        |                    |                                           |
| 4083                                | 40.958015<br>0.879556  | Cala de Gestell                               | SLI               | BRK           | 2±0.4         | 2.2±0.7       | U-series (E-57-A(a))               | MIS 5c          | 1,3                | Brückner, 1986                            |
|                                     |                        |                                               |                   |               |               |               | ESR (E-57-A(a))                    | 99±29.7         |                    |                                           |

| WALIS ID                                | Latitude Longitude    | Site                    | Type of datapoint | RSL Indicator | Elevation (m) | Paleo RSL (m) | Dating (Original ID)                         | Age (ka or MIS) | Quality (RSL, Age) | Reference(s)                                                                                                            |
|-----------------------------------------|-----------------------|-------------------------|-------------------|---------------|---------------|---------------|----------------------------------------------|-----------------|--------------------|-------------------------------------------------------------------------------------------------------------------------|
|                                         |                       |                         |                   |               |               |               | ESR (E-57-A(b))                              | 142±42.6        |                    |                                                                                                                         |
| 4084                                    | 40.899511<br>0.822442 | Cala del Torrent del Pi | SLI               | BRK           | 1±0.2         | 1.2±0.6       | U-series (E-58(a))                           | MIS 5           | 1,3                | Brückner, 1986                                                                                                          |
|                                         |                       |                         |                   |               |               |               | ESR (E-58(a))                                | 142±42.6        |                    |                                                                                                                         |
| <b>Spain (Islas Baleares, Mallorca)</b> |                       |                         |                   |               |               |               |                                              |                 |                    |                                                                                                                         |
| 779                                     | 39.543536<br>2.700453 | Cala Pudent             | SLI               | BRK           | 2.3±0.1       | 2.9±1.1       | STRAT ( <i>P. latus</i> or Senegalese fauna) | MIS 5           | 4,3                | Lorscheid et al., 2017<br>Butzer and Cuerda, 1962<br>Cuerda, 1979<br>Hearty, 1987b<br>Hillaire-Marcel et al., 1996      |
| 357                                     | 39.542175<br>2.702049 | Camp de Tir Unit U4     | SLI               | IMF           | 1.3±0         | 2.1±0.7       | U-series (MA-1)                              | 119.2±1.7       | 5,4                | Muhs et al., 2015<br>Butzer and Cuerda, 1962<br>Hearty, 1987b<br>Hillaire-Marcel et al., 1996<br>Lorscheid et al., 2017 |
|                                         |                       |                         |                   |               |               |               | U-series (MA-4)                              | 118.1±1.3       |                    |                                                                                                                         |
|                                         |                       |                         |                   |               |               |               | U-series (MA-5)                              | 114.8±2         |                    |                                                                                                                         |
|                                         |                       |                         |                   |               |               |               | U-series (MA-6)                              | 119.4±1.6       |                    |                                                                                                                         |
|                                         |                       |                         |                   |               |               |               | U-series (MA-7)                              | 111.7±1.4       |                    |                                                                                                                         |
|                                         |                       |                         |                   |               |               |               | U-series (MA-10)                             | 118.8±1.6       |                    |                                                                                                                         |
| U-series (MA-11)                        | 117.2±1.5             |                         |                   |               |               |               |                                              |                 |                    |                                                                                                                         |
| 780                                     | 39.497035<br>2.745646 | Cova Baixa (Son Grauet) | SLI               | BRK           | 1±0.3         | 1.6±1.2       | U-series (H-C-3)                             | 129±7           | 4,3                | Lorscheid et al., 2017<br>Butzer and Cuerda, 1962<br>Hearty et al., 1986a<br>Hearty, 1987b<br>Hoang and Hearty, 1989    |
|                                         |                       |                         |                   |               |               |               | U-series (4878A)                             | MIS 5e          |                    |                                                                                                                         |
|                                         |                       |                         |                   |               |               |               | U-series (4878B)                             | MIS 5e          |                    |                                                                                                                         |
|                                         |                       |                         |                   |               |               |               | U-series (4878C)                             | MIS 5e          |                    |                                                                                                                         |
|                                         |                       |                         |                   |               |               |               | AAR (Son Grauet)                             | MIS 5e          |                    |                                                                                                                         |
| AAR (Son Grauet 2)                      | MIS 5e                |                         |                   |               |               |               |                                              |                 |                    |                                                                                                                         |
| 781                                     | 39.488368<br>2.736524 | Cala Blava              | SLI               | BRK           | 2.7±0.1       | 3.3±1.1       | U-series (CB90-2)                            | MIS 5e          | 4,3                | Lorscheid et al., 2017<br>Butzer and Cuerda, 1962<br>Zazo et al., 2003                                                  |
| 782                                     | 39.364069<br>2.835928 | Cala Pi                 | SLI               | LIT           | 3.2±0.4       | 4±0.8         | AAR (Cala Pi)                                | MIS 5e          | 5,3                | Lorscheid et al., 2017<br>Butzer and Cuerda, 1962<br>Hearty, 1987b                                                      |
| 784                                     | 39.55927<br>3.374083  | S'Illot                 | TLI               |               | 5.5±1.7       | 0±0           | AAR (S'Illot)                                | MIS 5e          | 0,3                | Lorscheid et al., 2017<br>Butzer and Cuerda, 1962<br>Cuerda, 1979<br>Hearty, 1987b                                      |
| 785                                     | 39.59049<br>3.385249  | Cala Millor             | SLI               | BRK           | 1.5±0         | 3.6±2.8       | STRAT ( <i>P. latus</i> or Senegalese fauna) | MIS 5           | 3,3                | Lorscheid et al., 2017<br>Butzer and Cuerda, 1962<br>Cuerda, 1979<br>Hearty, 1987b                                      |

| WALIS ID                                   | Latitude Longitude    | Site                          | Type of datapoint | RSL Indicator | Elevation (m) | Paleo RSL (m) | Dating (Original ID)                         | Age (ka or MIS) | Quality (RSL, Age) | Reference(s)                                                                             |
|--------------------------------------------|-----------------------|-------------------------------|-------------------|---------------|---------------|---------------|----------------------------------------------|-----------------|--------------------|------------------------------------------------------------------------------------------|
| 786                                        | 39.653735<br>3.439101 | Canyamel                      | SLI               | BRK           | 1.3±0.5       | 3.3±2.8       | AAR (Canyamel)                               | MIS 5e          | 3,3                | Lorscheid et al., 2017<br>Butzer and Cuerda, 1962<br>Cuerda, 1979<br>Hearty, 1987b       |
| 787                                        | 39.748067<br>3.299692 | Caló des Camps                | SLI               | IMF           | 1.3±0.1       | 2.1±0.7       | STRAT ( <i>P. latus</i> or Senegalese fauna) | MIS 5           | 5,3                | Lorscheid et al., 2017<br>Butzer and Cuerda, 1962<br>Cuerda, 1979<br>Vicens et al., 2012 |
| 788                                        | 39.743077<br>3.20992  | Torrent de Son Real           | SLI               | BRK           | 0.9±0.1       | 2.2±2.3       | STRAT ( <i>P. latus</i> or Senegalese fauna) | MIS 5           | 3,3                | Lorscheid et al., 2017<br>Vicens et al., 2012                                            |
| 789                                        | 39.865498<br>3.136148 | Platja de Sant Joan           | SLI               | IMF           | 2.1±0.1       | 2.9±0.7       | STRAT ( <i>P. latus</i> or Senegalese fauna) | MIS 5           | 5,3                | Lorscheid et al., 2017<br>Cuerda, 1979<br>Vicens et al., 2012                            |
| <b>France (Languedoc-Roussillon)</b>       |                       |                               |                   |               |               |               |                                              |                 |                    |                                                                                          |
| 385                                        | 42.89<br>2.99         | Leucate<br>Le Malpas          | SLI               | BRK           | 4.4±0.9       | 4.9±2.6       | ESR (YR-C1)                                  | 128±15          | 3,3                | Ambert, 1999<br>Yokoyama et al., 1987                                                    |
|                                            |                       |                               |                   |               |               |               | STRAT ( <i>P. latus</i> or Senegalese fauna) | MIS 5           |                    |                                                                                          |
| 1316                                       | 42.93<br>3.01         | Leucate<br>La Franqui         | SLI               | BRK           | 2.5±0.5       | 3±2.5         | OTHER (Limiting radiocarbon date)            | >MIS 1          | 3,2                | Ambert, 1999<br>Nesteroff, 1984                                                          |
| 384                                        | 42.99<br>3.03         | Port la Nouvelle<br>Ramandils | SLI               | BRK           | 5.9±1.2       | 6.4±2.8       | ESR (YR-C1)                                  | 128±15          | 3,4                | Yokoyama et al., 1987<br>Ambert, 1999                                                    |
| 386                                        | 43.17<br>3.18         | Narbonne<br>Saint Pierre      | SLI               | BRK           | 1±0.2         | 1.5±2.5       | ESR (YR-C1)                                  | 128±15          | 3,3                | Ambert, 1999<br>Yokoyama et al., 1987                                                    |
|                                            |                       |                               |                   |               |               |               | STRAT ( <i>P. latus</i> or Senegalese fauna) | MIS 5           |                    |                                                                                          |
| <b>France (Provence-Alpes-Cote d'Azur)</b> |                       |                               |                   |               |               |               |                                              |                 |                    |                                                                                          |
| 387                                        | 43.52<br>5.1          | Etang de Berre                | SLI               | LAG           | 3±0.6         | 3±1.2         | U-series (11A)                               | MIS 5e          | 4,3                | Provansal et al., 1995                                                                   |
| 1988 (U-Series ID)                         | 43.54<br>7.13         | Cap d'Antibes                 | SLI               |               | 6±0.5         | 0 to -1       | U-series (6401-CalFxAg)                      | 125.5±5.2       | N/A                | Gilli, 2018                                                                              |
| 449                                        | 43.65<br>7.15         | Nice<br>Le Bosquet            | SLI               | BSD           | 16±0.3        | 14±1          | U-series (OS-1)                              | MIS 5e          | 4,3                | Dubar et al., 2008                                                                       |
|                                            |                       |                               |                   |               |               |               | U-series (OS-2)                              | MIS 5e          |                    |                                                                                          |
|                                            |                       |                               |                   |               |               |               | U-series (OS-3)                              | MIS 5e          |                    |                                                                                          |
|                                            |                       |                               |                   |               |               |               | U-series (OS-4)                              | MIS 5e          |                    |                                                                                          |
|                                            |                       |                               |                   |               |               |               | U-series (OS-5)                              | MIS 5e          |                    |                                                                                          |
|                                            |                       |                               |                   |               |               |               | U-series (OS-6)                              | MIS 5e          |                    |                                                                                          |
| 451                                        | 43.69<br>7.24         | Nice<br>Les amandier          | SLI               | BSD           | 10±0.3        | 10.3±1.3      | U-series (SP-1)                              | MIS 5e          | 4,3                | Dubar et al., 2008                                                                       |
|                                            |                       |                               |                   |               |               |               | U-series (SP-2)                              | MIS 5e          |                    |                                                                                          |
|                                            |                       |                               |                   |               |               |               | U-series (SP-3)                              | MIS 5e          |                    |                                                                                          |

| WALIS ID               | Latitude Longitude     | Site                      | Type of datapoint | RSL Indicator | Elevation (m) | Paleo RSL (m) | Dating (Original ID)                         | Age (ka or MIS) | Quality (RSL, Age) | Reference(s)                                                        |
|------------------------|------------------------|---------------------------|-------------------|---------------|---------------|---------------|----------------------------------------------|-----------------|--------------------|---------------------------------------------------------------------|
|                        |                        |                           |                   |               |               |               | U-series (SP-4)                              | MIS 5e          |                    |                                                                     |
| <b>Italy (Liguria)</b> |                        |                           |                   |               |               |               |                                              |                 |                    |                                                                     |
| 233                    | 43.783733<br>7.535579  | Barma Grande              | SLI               | NTC           | 11.4±2.5      | 11.4±2.6      | STRAT ( <i>P. latus</i> or Senegalese fauna) | MIS 5           | 3,3                | Federici and Pappalardo, 2006<br>De Lumley, 1969                    |
| 237                    | 43.783992<br>7.536568  | Grotta del Principe       | SLI               | NTC           | 12±2.4        | 12±2.4        | STRAT ( <i>P. latus</i> or Senegalese fauna) | MIS 5           | 3,3                | Federici and Pappalardo, 2006<br>Blanc, 1955<br>De Lumley, 1969     |
| 239                    | 43.78363<br>7.536336   | Bausu da Ture             | SLI               | BRK           | 10.3±2.2      | 10.4±2.3      | STRAT ( <i>P. latus</i> or Senegalese fauna) | MIS 5           | 3,3                | Federici and Pappalardo, 2006<br>De Lumley, 1969                    |
| 240                    | 43.783499<br>7.53541   | Ex Casino                 | SLI               | BRK           | 7±1.7         | 7.2±1.8       | STRAT ( <i>P. latus</i> or Senegalese fauna) | MIS 5           | 4,3                | Federici and Pappalardo, 2006<br>Vicino, 1974                       |
| 242                    | 43.828347<br>7.845687  | Madonna dell'Arma         | SLI               | BRK           | 7.3±1.5       | 7.5±1.6       | STRAT ( <i>P. latus</i> or Senegalese fauna) | MIS 5           | 4,3                | Federici and Pappalardo, 2006<br>Isetti et al., 1962                |
| 246                    | 44.242635<br>8.445059  | Grotta Marina di Bergeggi | SLI               | LIT           | 5±0.3         | 5.2±0.3       | STRAT ( <i>P. latus</i> or Senegalese fauna) | MIS 5           | 5,3                | Carobene, 2015<br>Oxilia, 1976<br>Vicino, 1978                      |
| <b>Italy (Toscana)</b> |                        |                           |                   |               |               |               |                                              |                 |                    |                                                                     |
| 250                    | 43.583<br>10.367       | Casale Vallino            | TLI               |               | 14±1.5        |               | STRAT ( <i>P. latus</i> or Senegalese fauna) | MIS 5           | 0,2                | Nisi et al., 2003<br>Ferranti et al., 2006                          |
| 251                    | 43.567<br>10.367       | Pian di Rota              | TLI               |               | 15±1.5        |               | STRAT ( <i>P. latus</i> or Senegalese fauna) | MIS 5           | 0,2                | Nisi et al., 2003<br>Ferranti et al., 2006                          |
| 252                    | 43.55<br>10.367        | Bagnetti                  | TLI               |               | 20±1.5        |               | STRAT ( <i>P. latus</i> or Senegalese fauna) | MIS 5           | 0,2                | Nisi et al., 2003<br>Ferranti et al., 2006                          |
| 253                    | 43.5<br>10.333         | Antignano                 | TLI               |               | 20±1.5        |               | STRAT ( <i>P. latus</i> or Senegalese fauna) | MIS 5           | 0,2                | Nisi et al., 2003<br>Ferranti et al., 2006                          |
| 254                    | 43.483<br>10.333       | Punta Casotto             | TLI               |               | 15±1.5        |               | STRAT ( <i>P. latus</i> or Senegalese fauna) | MIS 5           | 0,2                | Nisi et al., 2003<br>Ferranti et al., 2006                          |
| 255                    | 43.455494<br>10.372886 | Quercianella              | SLI               | BRK           | 10±3          | 10.1±3.1      | STRAT ( <i>P. latus</i> or Senegalese fauna) | MIS 5           | 2,1                | Boschian et al., 2006<br>Ferranti et al., 2006<br>Nisi et al., 2003 |
| 325                    | 43.411509<br>10.40289  | Buca dei Corvi<br>BdC1    | SLI               | FOR           | 9±2.1         | 9±2.1         | AAR (7.BucaDeiCorvi)                         | MIS 5e          | 3,2                | Mauz, 1999<br>Hearty et al., 1986a                                  |
|                        |                        |                           |                   |               |               |               | LUM (BdC 1)                                  | MIS 5d          |                    |                                                                     |
| 326                    | 43.411509<br>10.40289  | Buca dei Corvi<br>BdC2    | TLI               |               | 12±1.6        |               | LUM (BdC 2)                                  | 94±34           | 0,3                | Mauz, 1999                                                          |
| 329                    | 43.383<br>10.45        | Rosignano Solvay          | TLI               |               | 15±1.5        |               | STRAT ( <i>P. latus</i> or Senegalese fauna) | MIS 5           | 0,2                | Nisi et al., 2003<br>Ferranti et al., 2006                          |
| 327                    | 42.995168<br>10.514669 | Baratti<br>Bar 1          | SLI               | FOR           | 1.8±0.4       | 1.8±0.4       | LUM (Bar 1)                                  | MIS 5d          | 5,2                | Mauz, 1999                                                          |
| 328                    | 42.995168<br>10.514669 | Baratti<br>Bar 2          | SLI               | BSD           | 2.7±0.8       | 2.6±0.8       | LUM (Bar 2a)                                 | 77±10           | 5,4                | Mauz, 1999                                                          |
|                        |                        |                           |                   |               |               |               | LUM (Bar 2b)                                 | 68±8            |                    |                                                                     |
| 330                    |                        |                           | SLI               | BRK           | 1.7±0.1       | 1.8±0.5       | AAR (IsolaPianosa)                           | MIS 5e          | 5,4                |                                                                     |

| WALIS ID             | Latitude Longitude     | Site                                     | Type of datapoint | RSL Indicator | Elevation (m) | Paleo RSL (m) | Dating (Original ID)                         | Age (ka or MIS) | Quality (RSL, Age) | Reference(s)                                                                                          |
|----------------------|------------------------|------------------------------------------|-------------------|---------------|---------------|---------------|----------------------------------------------|-----------------|--------------------|-------------------------------------------------------------------------------------------------------|
|                      | 42.586973<br>10.100458 | Pianosa - Cala dei turchi 2              |                   |               |               |               | STRAT ( <i>P. latus</i> or Senegalese fauna) | MIS 5           |                    | Stocchi et al., 2018<br>Antonioli et al., 2011<br>Ferranti et al., 2006<br>Hearty and Dai Pra, 1987   |
| 331                  | 42.587368<br>10.100529 | Pianosa - Cala dei turchi 1              | SLI               | BIO           | 7.9±1.6       | 9.3±2.1       | STRAT ( <i>P. latus</i> or Senegalese fauna) | MIS 5           | 3,2                | Stocchi et al., 2018<br>Antonioli et al., 2011<br>Ferranti et al., 2006<br>Hearty and Dai Pra, 1987   |
| 335                  | 42.550897<br>11.165285 | Talamone                                 | SLI               | NTC           | 4.8±0.3       | 4.8±0.3       | STRAT (Mediterranean MIS 5e notches)         | MIS 5           | 5,2                | Antonioli et al., 2018<br>Ferranti et al., 2006<br>Nisi et al., 2003                                  |
| 336                  | 42.533<br>11.183       | Campo Regio                              | SLI               | BRK           | 6±3.5         | 6.1±3.5       | STRAT ( <i>P. latus</i> or Senegalese fauna) | MIS 5           | 2,3                | Nisi et al., 2003<br>Ferranti et al., 2006<br>Hearty and Dai Pra, 1987                                |
| 332                  | 42.411<br>11.406       | Selva Nera                               | SLI               | BRK           | 10±1.5        | 10.2±1.6      | AAR (9.Selvanera)                            | MIS 5e          | 3,3                | Hearty and Dai Pra, 1987<br>Bordoni and Valensise, 1999<br>Ferranti et al., 2006<br>Nisi et al., 2003 |
|                      |                        |                                          |                   |               |               |               | AAR (9.Selvanera_2)                          | MIS 5e          |                    |                                                                                                       |
| 334                  | 42.407086<br>11.448872 | San Angelino                             | SLI               | BRK           | 12±1.5        | 12.2±1.6      | AAR (11.SanAngelino)                         | MIS 5e          | 4,3                | Hearty and Dai Pra, 1987<br>Ferranti et al., 2006<br>Nisi et al., 2003                                |
| 333                  | 42.398721<br>11.447669 | Vado Piano                               | SLI               | BRK           | 13±2.6        | 13.2±2.7      | AAR (10.Vadopiano)                           | MIS 5e          | 2,3                | Hearty and Dai Pra, 1987<br>Ferranti et al., 2006                                                     |
| <b>Italy (Lazio)</b> |                        |                                          |                   |               |               |               |                                              |                 |                    |                                                                                                       |
| 354                  | 42.3831<br>11.4968     | Lasco Del Pozzo                          | SLI               | BRK           | 7±1.5         | 7.2±1.6       | AAR (12.LascoDelPozzo_1)                     | MIS 5e          | 4,3                | Hearty and Dai Pra, 1987<br>Bordoni and Valensise, 1999<br>Ferranti et al., 2006<br>Nisi et al., 2003 |
|                      |                        |                                          |                   |               |               |               | AAR (12.LascoDelPozzo_2)                     | MIS 5e          |                    |                                                                                                       |
|                      |                        |                                          |                   |               |               |               | AAR (12.LascoDelPozzo_3)                     | MIS 5e          |                    |                                                                                                       |
| 475                  | 42.3618<br>11.5394     | Centrale Nucleare Montalto di Castro     | SLI               | BRK           | 4.4±0.9       | 4.6±1.1       | AAR (13.Centrale Nucleare Montalto)          | MIS 5e          | 4,3                | Hearty and Dai Pra, 1987                                                                              |
| 476                  | 42.3677<br>11.5475     | La Ficonaccia                            | SLI               | BRK           | 12±2.4        | 12.2±2.5      | AAR (14.La Ficonaccia)                       | MIS 5e          | 1,3                | Hearty and Dai Pra, 1987                                                                              |
| 477                  | 42.3723<br>11.5554     | Ponte Rotto                              | SLI               | BRK           | 14±2.8        | 14.2±2.9      | AAR (15.Ponte Rotto.2)                       | MIS 5e          | 1,3                | Hearty and Dai Pra, 1987                                                                              |
|                      |                        |                                          |                   |               |               |               | AAR (15.Ponte Rotto.1)                       | MIS 5e          |                    |                                                                                                       |
| 478                  | 42.382<br>11.5556      | Km 115.5                                 | SLI               | BRK           | 20±1.5        | 20.2±1.6      | AAR (15.Km115.5)                             | MIS 5e          | 1,3                | Hearty and Dai Pra, 1987<br>Bordoni and Valensise, 1999<br>Ferranti et al., 2006<br>Nisi et al., 2003 |
| 482                  | 42.316667<br>11.642    | Il Mandrione, right bank of Arrone River | SLI               | BRK           | 24±4.8        | 24.2±4.8      | STRAT ( <i>P. latus</i> or Senegalese fauna) | MIS 5           | 2,1                | Palieri and Sposato, 1988<br>Bordoni and Valensise, 1999<br>Marra et al., 2019<br>Nisi et al., 2003   |
|                      |                        |                                          |                   |               |               |               | OTHER (MAND 1 B)                             | < 255           |                    |                                                                                                       |

| WALIS ID | Latitude Longitude   | Site                                   | Type of datapoint | RSL Indicator | Elevation (m) | Paleo RSL (m) | Dating (Original ID)                         | Age (ka or MIS) | Quality (RSL, Age) | Reference(s)                                                                                                                                              |
|----------|----------------------|----------------------------------------|-------------------|---------------|---------------|---------------|----------------------------------------------|-----------------|--------------------|-----------------------------------------------------------------------------------------------------------------------------------------------------------|
| 4070     | 42.3077<br>11.6478   | Riva Dei Tarquini                      | SLI               | MT            | 25±5          | 24.9±5.1      | U-series (RTAR(1)-IN)                        | MIS 5           | 3,4                | Radtke, 1983<br>Radtke, 1986                                                                                                                              |
|          |                      |                                        |                   |               |               |               | U-series (RTAR(1)-OUT)                       | MIS 5           |                    |                                                                                                                                                           |
|          |                      |                                        |                   |               |               |               | ESR (RTAR(1)-IN)                             | 102±20.4        |                    |                                                                                                                                                           |
|          |                      |                                        |                   |               |               |               | ESR (RTAR(1)-OUT)                            | 112±22.4        |                    |                                                                                                                                                           |
| 481      | 42.29<br>11.67       | Between Arrone and Mignone rivers      | SLI               | BRK           | 20±4          | 20.2±4        | STRAT ( <i>P. latus</i> or Senegalese fauna) | MIS 5           | 2,3                | Bordoni and Valensise, 1999<br>Bonadonna, 1967<br>Gignoux, 1913                                                                                           |
| 483      | 42.289<br>11.682     | Aurelia km 103                         | SLI               | BRK           | 25±5          | 25.2±5        | AAR (5.KM103.1)                              | MIS 5e          | 2,3                | Hearty and Dai Pra, 1986<br>Bordoni and Valensise, 1999<br>Nisi et al., 2003                                                                              |
|          |                      |                                        |                   |               |               |               | AAR (5.KM103.2)                              | MIS 5e          |                    |                                                                                                                                                           |
| 484      | 42.23<br>11.73       | Northwest of Tarquinia railway station | SLI               | BRK           | 13±2.8        | 13.2±2.9      | STRAT ( <i>P. latus</i> or Senegalese fauna) | MIS 5           | 3,3                | Palieri and Sposato, 1988<br>Bordoni and Valensise, 1999<br>Nisi et al., 2003                                                                             |
| 4071     | 42.18628<br>11.74356 | Km17-1(k)                              | MLI               |               | 8.7±2.1       |               | U-series (Km17-1(k))                         | MIS 5           | 0,3                | Radtke, 1983<br>Radtke, 1986                                                                                                                              |
|          |                      |                                        |                   |               |               |               | ESR (Km17-1(k))                              | 79±15.8         |                    |                                                                                                                                                           |
| 479      | 42.216<br>11.7461    | F. delle Serpe                         | SLI               | BRK           | 12±2.4        | 12.2±2.5      | AAR (24.F. delle Serpe)                      | MIS 5e          | 1,3                | Hearty and Dai Pra, 1987                                                                                                                                  |
|          |                      |                                        |                   |               |               |               | STRAT ( <i>P. latus</i> or Senegalese fauna) | MIS 5           |                    |                                                                                                                                                           |
| 480      | 42.1859<br>11.7453   | Casale Olivastro                       | SLI               | BRK           | 16±3          | 16.2±3.1      | AAR (26. C.le Olivastro)                     | MIS 5e          | 1,3                | Hearty and Dai Pra, 1987<br>Bonadonna, 1967<br>Ferranti et al., 2006<br>Nisi et al., 2003                                                                 |
|          |                      |                                        |                   |               |               |               | STRAT ( <i>P. latus</i> or Senegalese fauna) | MIS 5           |                    |                                                                                                                                                           |
| 4072     | 42.20493<br>11.79407 | Casal San Vincenzo (CSV)               | SLI               | BRK           | 33±2.1        | 33.2±2.1      | U-series (CSV-P-1)                           | MIS 5           | 2,4                | Radtke, 1983<br>Radtke, 1986                                                                                                                              |
|          |                      |                                        |                   |               |               |               | U-series (CSV-P-2)                           | MIS 5           |                    |                                                                                                                                                           |
|          |                      |                                        |                   |               |               |               | ESR (CSV-P-1)                                | 111±22.2        |                    |                                                                                                                                                           |
|          |                      |                                        |                   |               |               |               | ESR (CSV-P-2)                                | 92±18.4         |                    |                                                                                                                                                           |
| 494      | 42.11<br>11.811      | Monna Felice                           | SLI               | MT            | 35±1.5        | 34.9±1.7      | STRAT ( <i>P. latus</i> or Senegalese fauna) | MIS 5           | 4,3                | Bordoni and Valensise, 1999<br>Ferranti et al., 2006<br>Nisi et al., 2003<br>Benjamin et al., 2017<br>Gignoux, 1913<br>Taviani, 2014<br>Zazo et al., 2013 |
| 495      | 41.994<br>12.109     | Monteroni - Cerveteri                  | SLI               | LAG           | 27±1.5        | 28.1±1.8      | AAR (4.Cerveteri-Monteroni 1)                | MIS 5e          | 4,3                | Hearty and Dai Pra, 1986<br>Bordoni and Valensise, 1999<br>Ferranti et al., 2006<br>Nisi et al., 2003                                                     |
|          |                      |                                        |                   |               |               |               | AAR (4.Cerveteri-Monteroni 2)                |                 |                    |                                                                                                                                                           |
|          |                      |                                        |                   |               |               |               | AAR (4.Cerveteri-Monteroni 3)                |                 |                    |                                                                                                                                                           |



| WALIS ID | Latitude Longitude     | Site                              | Type of datapoint | RSL Indicator | Elevation (m) | Paleo RSL (m) | Dating (Original ID)                         | Age (ka or MIS) | Quality (RSL, Age) | Reference(s)                                                                                          |
|----------|------------------------|-----------------------------------|-------------------|---------------|---------------|---------------|----------------------------------------------|-----------------|--------------------|-------------------------------------------------------------------------------------------------------|
| 496      | 41.933<br>12.207       | Casale di Statua                  | SLI               | BRK           | 19±3.8        | 19.2±3.9      | AAR (3. Palidoro (Blanc))                    | MIS 5e          | 2,3                | Hearty and Dai Pra, 1986<br>Bordoni and Valensise, 1999<br>Ferranti et al., 2006<br>Nisi et al., 2003 |
| 529      | 41.824314<br>12.331983 | Cava Rinaldi (point d)            | TLI               |               | 26.1±0.02     |               | OTHER (NCR2)                                 | MIS 5e          | 0,4                | Marra et al., 2016<br>Marra et al., 2019                                                              |
| 527      | 41.4571<br>12.7742     | Quadrato                          | SLI               | BRK           | 11±2.4        | 11.2±2.5      | ESR (QDT 1601)                               | 79±7            | 1,1                | Marra et al., 2019                                                                                    |
|          |                        |                                   |                   |               |               |               | STRAT ( <i>P. latus</i> or Senegalese fauna) | MIS 5           |                    |                                                                                                       |
| 497      | 41.46<br>12.81         | Borgo Santa Maria, west of Latina | SLI               | BRK           | 12±2.4        | 12.2±2.5      | AAR (15. Casale Nuovo - Borgo S. Maria)      | MIS 5e          | 3,3                | Hearty and Dai Pra, 1986<br>Bordoni and Valensise, 1999                                               |
| 498      | 41.43<br>12.82         | Borgo Sabotino                    | SLI               | BRK           | 10±3.5        | 10.2±3.6      | AAR (16.Borgo Sabotino A)                    | MIS 5e          | 2,3                | Hearty and Dai Pra, 1986<br>Bordoni and Valensise, 1999<br>Ferranti et al., 2006<br>Nisi et al., 2003 |
|          |                        |                                   |                   |               |               |               | AAR (16.Borgo Sabotino B-C)                  |                 |                    |                                                                                                       |
|          |                        |                                   |                   |               |               |               | AAR (16.Borgo Sabotino B-C 2)                |                 |                    |                                                                                                       |
| 513      | 41.417<br>13.05        | Pontinia I                        | SLI               | LAG           | 5.3±2         | 6.4±2.2       | STRAT (Mediterranean AAR Aminozone E)        | MIS 5e          | 3,3                | Antonioli et al., 1999b<br>Ferranti et al., 2006<br>Nisi et al., 2003                                 |
| 514      | 41.417<br>13.067       | Pontinia II                       | SLI               | LAG           | 4.4±2         | 5.5±2.2       | STRAT (Mediterranean AAR Aminozone E)        | MIS 5e          | 3,3                | Antonioli et al., 1999b<br>Ferranti et al., 2006<br>Nisi et al., 2003                                 |
| 515      | 41.433<br>13.067       | Pontinia III                      | SLI               | LAG           | 2.3±2         | 3.4±2.2       | STRAT (Mediterranean AAR Aminozone E)        | MIS 5e          | 3,3                | Antonioli et al., 1999b<br>Ferranti et al., 2006<br>Nisi et al., 2003                                 |
| 516      | 41.433<br>13.083       | Pontinia IV                       | SLI               | LAG           | 0.8±2         | 1.9±2.2       | STRAT (Mediterranean AAR Aminozone E)        | MIS 5e          | 3,3                | Antonioli et al., 1999b<br>Ferranti et al., 2006<br>Nisi et al., 2003                                 |
| 517      | 41.45<br>13.083        | Pontinia V                        | SLI               | LAG           | -0.5±2        | 0.6±2.2       | STRAT (Mediterranean AAR Aminozone E)        | MIS 5e          | 3,3                | Antonioli et al., 1999b<br>Ferranti et al., 2006<br>Nisi et al., 2003                                 |
| 518      | 41.45<br>13.1          | Pontinia VI                       | SLI               | LAG           | -15.5±5       | -14.4±5.1     | STRAT (Mediterranean AAR Aminozone E)        | MIS 5e          | 2,3                | Antonioli et al., 1999b<br>Ferranti et al., 2006<br>Nisi et al., 2003                                 |
| 519      | 41.35<br>13.117        | Borgo Vodice I                    | SLI               | LAG           | 1±2           | 2.1±2.2       | STRAT (Mediterranean AAR Aminozone E)        | MIS 5e          | 3,3                | Antonioli et al., 1999b<br>Ferranti et al., 2006<br>Nisi et al., 2003                                 |
| 520      | 41.35<br>13.117        | Borgo Vodice II                   | SLI               | LAG           | -0.6±2        | 0.5±2.2       | STRAT (Mediterranean AAR Aminozone E)        | MIS 5e          | 3,3                | Antonioli et al., 1999b<br>Ferranti et al., 2006<br>Nisi et al., 2003                                 |
| 521      | 41.35<br>13.117        | Borgo Vodice III                  | SLI               | LAG           | -1.8±2        | -0.7±2.2      | STRAT (Mediterranean AAR Aminozone E)        | MIS 5e          | 3,3                | Antonioli et al., 1999b<br>Ferranti et al., 2006<br>Nisi et al., 2003                                 |

| WALIS ID                | Latitude Longitude     | Site                                  | Type of datapoint | RSL Indicator | Elevation (m) | Paleo RSL (m) | Dating (Original ID)                          | Age (ka or MIS) | Quality (RSL, Age) | Reference(s)                                                                                        |
|-------------------------|------------------------|---------------------------------------|-------------------|---------------|---------------|---------------|-----------------------------------------------|-----------------|--------------------|-----------------------------------------------------------------------------------------------------|
| 499                     | 41.224<br>13.065       | Torre Rossa                           | MLI               |               | 3±0.6         |               | AAR (Torre Rossa 1)                           | MIS 5e          | 0,3                | Hearty and Dai Pra, 1986<br>Bordoni and Valensise, 1999                                             |
|                         |                        |                                       |                   |               |               |               | AAR (Torre Rossa 2)                           |                 |                    |                                                                                                     |
|                         |                        |                                       |                   |               |               |               | AAR (Torre Rossa 3)                           |                 |                    |                                                                                                     |
| 522                     | 41.223901<br>13.082592 | Circeo (Grotta delle Capre)           | SLI               | NTC           | 9.3±0.2       | 9.3±0.2       | STRAT (Mediterranean MIS 5e notches)          | MIS 5           | 5,2                | Antonioli et al., 2018<br>Ferranti et al., 2006<br>Nisi et al., 2003                                |
| 523                     | 41.288243<br>13.260035 | Terracina (Pisco Montano)             | SLI               | NTC           | 8±0.2         | 8±0.2         | STRAT (Mediterranean MIS 5e notches)          | MIS 5           | 5,2                | Antonioli et al., 2018<br>Ferranti et al., 2006<br>Nisi et al., 2003                                |
| 508                     | 41.302<br>13.338       | Fondi plain core ATP4                 | SLI               | LAG           | -6±2          | -4.9±2.2      | AAR (ATP4 1)                                  | MIS 5e          | 2,1                | Antonioli et al., 1988<br>Bordoni and Valensise, 1999<br>Ferranti et al., 2006<br>Nisi et al., 2003 |
|                         |                        |                                       |                   |               |               |               | AAR (ATP4 2)                                  | MIS 5e          |                    |                                                                                                     |
|                         |                        |                                       |                   |               |               |               | AAR (ATP4 3)                                  | MIS 5e          |                    |                                                                                                     |
| 500                     | 41.244<br>13.471       | Torre Capoverto                       | SLI               | BRK           | 5±1           | 5.2±1.2       | AAR (Torre Capoverto)                         | MIS 5e          | 2,1                | Hearty and Dai Pra, 1986<br>Bordoni and Valensise, 1999                                             |
| 524                     | 41.21845<br>13.532598  | Sperlonga (Sant'agostino)             | SLI               | NTC           | 6.5±0.2       | 6.5±0.2       | STRAT (Mediterranean MIS 5e notches)          | MIS 5           | 5,2                | Antonioli et al., 2018<br>Ferranti et al., 2006<br>Nisi et al., 2003                                |
| 525                     | 41.204594<br>13.57162  | Gaeta (Grotta del Turco)              | SLI               | NTC           | 5.9±0.3       | 5.9±0.3       | STRAT (Mediterranean MIS 5e notches)          | MIS 5           | 5,2                | Antonioli et al., 2018<br>Ferranti et al., 2006<br>Nisi et al., 2003                                |
| 501                     | 41.268<br>13.715       | Marina di Minturno                    | SLI               | BRK           | 8±1.6         | 8.2±1.7       | AAR (20. Marina di Minturno)                  | MIS 5e          | 2,1                | Hearty and Dai Pra, 1986<br>Bordoni and Valensise, 1999                                             |
| 526                     | 41.239725<br>13.736821 | Minturno (Monte d'Argento)            | SLI               | NTC           | 12.5±0.2      | 12.5±0.2      | STRAT (Mediterranean MIS 5e notches)          | MIS 5           | 5,2                | Antonioli et al., 2018<br>Ferranti et al., 2006<br>Nisi et al., 2003                                |
| <b>Italy (Campania)</b> |                        |                                       |                   |               |               |               |                                               |                 |                    |                                                                                                     |
| 3624                    | 41.201997<br>13.832    | Cellole Aurunci Masseria Transitiello | MLI               |               | 6±1.2         | 6±1.2         | AAR (Cellole Aurunci (Masseria Transitiello)) | 130±39          | 0,3                | Branaccio et al., 1990                                                                              |
| 722                     | 40.991003<br>14.175998 | San Marcellino well                   | MLI               |               | -50±1         | 0±1           | U-series (1122a)                              | 138±10          | 0,4                | Romano et al., 1994                                                                                 |
|                         |                        |                                       |                   |               |               |               | U-series (1122b)                              | 137±11          |                    |                                                                                                     |
| 739                     | 41.026523<br>14.3394   | San Marco Evangelista                 | MLI               |               | -18±1         |               | STRAT (Sep 4)                                 | >MIS 5c         | 0,2                | Santangelo et al., 2010                                                                             |
|                         |                        |                                       |                   |               |               |               | OTHER (San Marco Evangelista)                 | <MIS 7          |                    |                                                                                                     |
| 790                     | 40.781963<br>14.649142 | Sarno well                            | MLI               |               | -23±1         |               | U-series (N/A)                                | 217±65.1        | 0,3                | Cinque et al., 1987<br>Barra et al., 1991                                                           |
|                         |                        |                                       |                   |               |               |               | STRAT (Sylvestra seminis)                     | MIS 5e          |                    |                                                                                                     |
| 3581                    | 40.586558<br>14.327083 | Mitigliano                            | SLI               | NTC           | 5±0.3         | 5±0.3         | U-series (C-1)                                | 128±5           | 5,2                | Antonioli et al., 2018<br>Branaccio et al., 1978                                                    |
|                         |                        |                                       |                   |               |               |               | U-series (C-3)                                | 131±6           |                    |                                                                                                     |

| WALIS ID | Latitude Longitude     | Site                              | Type of datapoint | RSL Indicator | Elevation (m) | Paleo RSL (m) | Dating (Original ID) | Age (ka or MIS) | Quality (RSL, Age) | Reference(s)                                          |
|----------|------------------------|-----------------------------------|-------------------|---------------|---------------|---------------|----------------------|-----------------|--------------------|-------------------------------------------------------|
|          |                        |                                   |                   |               |               |               | U-series (C-4)       | 133±6           |                    |                                                       |
|          |                        |                                   |                   |               |               |               | U-series (C-5)       | 123±8           |                    |                                                       |
| 821      | 40.559447<br>14.256813 | Scoglio Ricotta (I)<br>Capri      | SLI               | NTC           | 6.8±0.1       | 6.8±0.2       | U-series (C-1)       | 128±5           | 5,2                | Ferranti & Antonioli, 2007<br>Brancaccio et al., 1978 |
|          |                        |                                   |                   |               |               |               | U-series (C-3)       | 131±6           |                    |                                                       |
|          |                        |                                   |                   |               |               |               | U-series (C-4)       | 133±6           |                    |                                                       |
|          |                        |                                   |                   |               |               |               | U-series (C-5)       | 123±8           |                    |                                                       |
| 822      | 40.558063<br>14.255372 | Scoglio Ricotta (II)<br>Capri     | SLI               | NTC           | 6±0.1         | 6±0.2         | U-series (C-1)       | 128±5           | 5,2                | Ferranti & Antonioli, 2007<br>Brancaccio et al., 1978 |
|          |                        |                                   |                   |               |               |               | U-series (C-3)       | 131±6           |                    |                                                       |
|          |                        |                                   |                   |               |               |               | U-series (C-4)       | 133±6           |                    |                                                       |
|          |                        |                                   |                   |               |               |               | U-series (C-5)       | 123±8           |                    |                                                       |
| 800      | 40.561826<br>14.212505 | Grotta Testa del Cavallo<br>Capri | SLI               | NTC           | 5.2±0.1       | 5.2±0.2       | U-series (C-1)       | 128±5           | 5,2                | Ferranti & Antonioli, 2007<br>Brancaccio et al., 1978 |
|          |                        |                                   |                   |               |               |               | U-series (C-3)       | 131±6           |                    |                                                       |
|          |                        |                                   |                   |               |               |               | U-series (C-4)       | 133±6           |                    |                                                       |
|          |                        |                                   |                   |               |               |               | U-series (C-5)       | 123±8           |                    |                                                       |
| 801      | 40.553387<br>14.200844 | Grotta Jannarella<br>Capri        | SLI               | NTC           | 6.4±0.1       | 6.4±0.2       | U-series (C-1)       | 128±5           | 5,2                | Ferranti & Antonioli, 2007<br>Brancaccio et al., 1978 |
|          |                        |                                   |                   |               |               |               | U-series (C-3)       | 131±6           |                    |                                                       |
|          |                        |                                   |                   |               |               |               | U-series (C-4)       | 133±6           |                    |                                                       |
|          |                        |                                   |                   |               |               |               | U-series (C-5)       | 123±8           |                    |                                                       |
| 802      | 40.548815<br>14.197435 | P.ta Campitiello<br>Capri         | SLI               | NTC           | 6.2±0.1       | 6.2±0.2       | U-series (C-1)       | 128±5           | 5,2                | Ferranti & Antonioli, 2007<br>Brancaccio et al., 1978 |
|          |                        |                                   |                   |               |               |               | U-series (C-3)       | 131±6           |                    |                                                       |
|          |                        |                                   |                   |               |               |               | U-series (C-4)       | 133±6           |                    |                                                       |
|          |                        |                                   |                   |               |               |               | U-series (C-5)       | 123±8           |                    |                                                       |
| 803      | 40.541143<br>14.199689 | Cala del Limmo<br>Capri           | SLI               | NTC           | 7.3±0.1       | 7.3±0.2       | U-series (C-1)       | 128±5           | 5,2                | Ferranti & Antonioli, 2007<br>Brancaccio et al., 1978 |
|          |                        |                                   |                   |               |               |               | U-series (C-3)       | 131±6           |                    |                                                       |
|          |                        |                                   |                   |               |               |               | U-series (C-4)       | 133±6           |                    |                                                       |
|          |                        |                                   |                   |               |               |               | U-series (C-5)       | 123±8           |                    |                                                       |
| 805      | 40.538602<br>14.204492 | Cala Articola (II)<br>Capri       | SLI               | NTC           | 5.7±0.1       | 5.7±0.2       | U-series (C-1)       | 128±5           | 5,2                | Ferranti & Antonioli, 2007<br>Brancaccio et al., 1978 |
|          |                        |                                   |                   |               |               |               | U-series (C-3)       | 131±6           |                    |                                                       |
|          |                        |                                   |                   |               |               |               | U-series (C-4)       | 133±6           |                    |                                                       |

| WALIS ID | Latitude Longitude     | Site                         | Type of datapoint | RSL Indicator | Elevation (m) | Paleo RSL (m) | Dating (Original ID) | Age (ka or MIS) | Quality (RSL, Age) | Reference(s)                                          |
|----------|------------------------|------------------------------|-------------------|---------------|---------------|---------------|----------------------|-----------------|--------------------|-------------------------------------------------------|
|          |                        |                              |                   |               |               |               | U-series (C-5)       | 123±8           |                    |                                                       |
| 804      | 40.537802<br>14.204509 | Cala Articola (I)<br>Capri   | SLI               | NTC           | 6.3±0.1       | 6.3±0.2       | U-series (C-1)       | 128±5           | 5,2                | Ferranti & Antonioli, 2007<br>Brancaccio et al., 1978 |
|          |                        |                              |                   |               |               |               | U-series (C-3)       | 131±6           |                    |                                                       |
|          |                        |                              |                   |               |               |               | U-series (C-4)       | 133±6           |                    |                                                       |
|          |                        |                              |                   |               |               |               | U-series (C-5)       | 123±8           |                    |                                                       |
| 806      | 40.538289<br>14.205436 | Cala Articola (III)<br>Capri | SLI               | NTC           | 7±0.1         | 7±0.2         | U-series (C-1)       | 128±5           | 5,2                | Ferranti & Antonioli, 2007<br>Brancaccio et al., 1978 |
|          |                        |                              |                   |               |               |               | U-series (C-3)       | 131±6           |                    |                                                       |
|          |                        |                              |                   |               |               |               | U-series (C-4)       | 133±6           |                    |                                                       |
|          |                        |                              |                   |               |               |               | U-series (C-5)       | 123±8           |                    |                                                       |
| 807      | 40.540234<br>14.214724 | Grotta Verde (I)<br>Capri    | SLI               | NTC           | 6.9±0.1       | 6.9±0.2       | U-series (C-1)       | 128±5           | 5,2                | Ferranti & Antonioli, 2007<br>Brancaccio et al., 1978 |
|          |                        |                              |                   |               |               |               | U-series (C-3)       | 131±6           |                    |                                                       |
|          |                        |                              |                   |               |               |               | U-series (C-4)       | 133±6           |                    |                                                       |
|          |                        |                              |                   |               |               |               | U-series (C-5)       | 123±8           |                    |                                                       |
| 808      | 40.539815<br>14.220159 | Grotta Verde (II)<br>Capri   | SLI               | NTC           | 6.8±0.1       | 6.8±0.2       | U-series (C-1)       | 128±5           | 5,2                | Ferranti & Antonioli, 2007<br>Brancaccio et al., 1978 |
|          |                        |                              |                   |               |               |               | U-series (C-3)       | 131±6           |                    |                                                       |
|          |                        |                              |                   |               |               |               | U-series (C-4)       | 133±6           |                    |                                                       |
|          |                        |                              |                   |               |               |               | U-series (C-5)       | 123±8           |                    |                                                       |
| 809      | 40.544828<br>14.248626 | Gr. Belvedere<br>Capri       | SLI               | NTC           | 7±0.1         | 7±0.2         | U-series (C-1)       | 128±5           | 5,2                | Ferranti & Antonioli, 2007<br>Brancaccio et al., 1978 |
|          |                        |                              |                   |               |               |               | U-series (C-3)       | 131±6           |                    |                                                       |
|          |                        |                              |                   |               |               |               | U-series (C-4)       | 133±6           |                    |                                                       |
|          |                        |                              |                   |               |               |               | U-series (C-5)       | 123±8           |                    |                                                       |
| 810      | 40.544077<br>14.249734 | Gr. Fontolina<br>Capri       | SLI               | NTC           | 7.2±0.1       | 7.2±0.2       | U-series (C-1)       | 128±5           | 5,2                | Ferranti & Antonioli, 2007<br>Brancaccio et al., 1978 |
|          |                        |                              |                   |               |               |               | U-series (C-3)       | 131±6           |                    |                                                       |
|          |                        |                              |                   |               |               |               | U-series (C-4)       | 133±6           |                    |                                                       |
|          |                        |                              |                   |               |               |               | U-series (C-5)       | 123±8           |                    |                                                       |
| 811      | 40.540329<br>14.253427 | I Faraglioni<br>Capri        | SLI               | NTC           | 7±0.1         | 7±0.2         | U-series (C-1)       | 128±5           | 5,2                | Ferranti & Antonioli, 2007<br>Brancaccio et al., 1978 |
|          |                        |                              |                   |               |               |               | U-series (C-3)       | 131±6           |                    |                                                       |
|          |                        |                              |                   |               |               |               | U-series (C-4)       | 133±6           |                    |                                                       |
|          |                        |                              |                   |               |               |               | U-series (C-5)       | 123±8           |                    |                                                       |

| WALIS ID | Latitude Longitude     | Site                           | Type of datapoint | RSL Indicator | Elevation (m) | Paleo RSL (m) | Dating (Original ID) | Age (ka or MIS) | Quality (RSL, Age) | Reference(s)                                          |
|----------|------------------------|--------------------------------|-------------------|---------------|---------------|---------------|----------------------|-----------------|--------------------|-------------------------------------------------------|
| 812      | 40.544389<br>14.253885 | Porto di Tragara (I)<br>Capri  | SLI               | NTC           | 8±0.1         | 8±0.2         | U-series (C-1)       | 128±5           | 5,2                | Ferranti & Antonioli, 2007<br>Brancaccio et al., 1978 |
|          |                        |                                |                   |               |               |               | U-series (C-3)       | 131±6           |                    |                                                       |
|          |                        |                                |                   |               |               |               | U-series (C-4)       | 133±6           |                    |                                                       |
|          |                        |                                |                   |               |               |               | U-series (C-5)       | 123±8           |                    |                                                       |
| 813      | 40.545543<br>14.25671  | Porto di Tragara (II)<br>Capri | SLI               | NTC           | 7.9±0.1       | 7.9±0.2       | U-series (C-1)       | 128±5           | 5,2                | Ferranti & Antonioli, 2007<br>Brancaccio et al., 1978 |
|          |                        |                                |                   |               |               |               | U-series (C-3)       | 131±6           |                    |                                                       |
|          |                        |                                |                   |               |               |               | U-series (C-4)       | 133±6           |                    |                                                       |
|          |                        |                                |                   |               |               |               | U-series (C-5)       | 123±8           |                    |                                                       |
| 814      | 40.548585<br>14.258138 | P.ta di Masullo<br>Capri       | SLI               | NTC           | 7.1±0.1       | 7.1±0.2       | U-series (C-1)       | 128±5           | 5,2                | Ferranti & Antonioli, 2007<br>Brancaccio et al., 1978 |
|          |                        |                                |                   |               |               |               | U-series (C-3)       | 131±6           |                    |                                                       |
|          |                        |                                |                   |               |               |               | U-series (C-4)       | 133±6           |                    |                                                       |
|          |                        |                                |                   |               |               |               | U-series (C-5)       | 123±8           |                    |                                                       |
| 815      | 40.55045<br>14.258592  | a vascio funno<br>Capri        | SLI               | NTC           | 7.4±0.1       | 7.4±0.2       | U-series (C-1)       | 128±5           | 5,2                | Ferranti & Antonioli, 2007<br>Brancaccio et al., 1978 |
|          |                        |                                |                   |               |               |               | U-series (C-3)       | 131±6           |                    |                                                       |
|          |                        |                                |                   |               |               |               | U-series (C-4)       | 133±6           |                    |                                                       |
|          |                        |                                |                   |               |               |               | U-series (C-5)       | 123±8           |                    |                                                       |
| 816      | 40.551218<br>14.259126 | Cala Materniana<br>Capri       | SLI               | NTC           | 7.3±0.1       | 7.3±0.2       | U-series (C-1)       | 128±5           | 5,2                | Ferranti & Antonioli, 2007<br>Brancaccio et al., 1978 |
|          |                        |                                |                   |               |               |               | U-series (C-3)       | 131±6           |                    |                                                       |
|          |                        |                                |                   |               |               |               | U-series (C-4)       | 133±6           |                    |                                                       |
|          |                        |                                |                   |               |               |               | U-series (C-5)       | 123±8           |                    |                                                       |
| 817      | 40.552457<br>14.260347 | Gr. Bianca (I)<br>Capri        | SLI               | NTC           | 7.3±0.1       | 7.3±0.2       | U-series (C-1)       | 128±5           | 5,2                | Ferranti & Antonioli, 2007<br>Brancaccio et al., 1978 |
|          |                        |                                |                   |               |               |               | U-series (C-3)       | 131±6           |                    |                                                       |
|          |                        |                                |                   |               |               |               | U-series (C-4)       | 133±6           |                    |                                                       |
|          |                        |                                |                   |               |               |               | U-series (C-5)       | 123±8           |                    |                                                       |
| 818      | 40.552671<br>14.260601 | Gr. Bianca (II)<br>Capri       | SLI               | NTC           | 7.5±0.1       | 7.5±0.2       | U-series (C-1)       | 128±5           | 5,2                | Ferranti & Antonioli, 2007<br>Brancaccio et al., 1978 |
|          |                        |                                |                   |               |               |               | U-series (C-3)       | 131±6           |                    |                                                       |
|          |                        |                                |                   |               |               |               | U-series (C-4)       | 133±6           |                    |                                                       |
|          |                        |                                |                   |               |               |               | U-series (C-5)       | 123±8           |                    |                                                       |
| 819      |                        |                                | SLI               | NTC           | 7.5±0.1       | 7.5±0.2       | U-series (C-1)       | 128±5           | 5,2                |                                                       |

| WALIS ID | Latitude Longitude     | Site                             | Type of datapoint | RSL Indicator | Elevation (m) | Paleo RSL (m) | Dating (Original ID)                            | Age (ka or MIS) | Quality (RSL, Age) | Reference(s)                                                           |
|----------|------------------------|----------------------------------|-------------------|---------------|---------------|---------------|-------------------------------------------------|-----------------|--------------------|------------------------------------------------------------------------|
|          | 40.553863<br>14.262962 | P.ta della Chiavica<br>Capri     |                   |               |               |               | U-series (C-3)                                  | 131±6           |                    | Ferranti & Antonioli, 2007<br>Brancaccio et al., 1978                  |
|          |                        |                                  |                   |               |               |               | U-series (C-4)                                  | 133±6           |                    |                                                                        |
|          |                        |                                  |                   |               |               |               | U-series (C-5)                                  | 123±8           |                    |                                                                        |
| 820      | 40.554617<br>14.265368 | P.ta del Monaco<br>Capri         | SLI               | NTC           | 7.7±0.1       | 7.7±0.2       | U-series (C-1)                                  | 128±5           | 5,2                | Ferranti & Antonioli, 2007<br>Brancaccio et al., 1978                  |
|          |                        |                                  |                   |               |               |               | U-series (C-3)                                  | 131±6           |                    |                                                                        |
|          |                        |                                  |                   |               |               |               | U-series (C-4)                                  | 133±6           |                    |                                                                        |
|          |                        |                                  |                   |               |               |               | U-series (C-5)                                  | 123±8           |                    |                                                                        |
| 721      | 40.574093<br>14.339977 | Cala di Ieranto                  | SLI               | NTC           | 7.5±0.5       | 7.5±0.5       | U-series (C-3)                                  | 131±6           | 5,2                | Brancaccio et al., 1978                                                |
|          |                        |                                  |                   |               |               |               | U-series (C-4)                                  | 133±6           |                    |                                                                        |
|          |                        |                                  |                   |               |               |               | U-series (C-5)                                  | 123±8           |                    |                                                                        |
| 823      | 40.613132<br>14.520381 | Vettica Maggiore                 | SLI               | NTC           | 6.8±0.1       | 6.8±0.2       | U-series (C-1)                                  | 128±5           | 5,2                | Ferranti & Antonioli, 2007<br>Brancaccio et al., 1978                  |
|          |                        |                                  |                   |               |               |               | U-series (C-3)                                  | 131±6           |                    |                                                                        |
|          |                        |                                  |                   |               |               |               | U-series (C-4)                                  | 133±6           |                    |                                                                        |
|          |                        |                                  |                   |               |               |               | U-series (C-5)                                  | 123±8           |                    |                                                                        |
| 798      | 40.614439<br>14.567143 | Grotta dello Smeraldo            | SLI               | LIT           | 8±1.6         | 7.8±1.9       | STRAT ( <i>P. latus</i> or<br>Senegalese fauna) | MIS 5           | 4,3                | Cosentino & Gliozzi, 1988<br>Colantoni, 1970                           |
| 767      | 40.613522<br>14.575294 | Conca dei Marini (III)<br>Site I | SLI               | NTC           | 3.5±0.5       | 3.5±0.5       | U-series (CM6)                                  | <109.1±7.3      | 5,2                | Iannace et al., 2003<br>Brancaccio et al., 1978<br>Riccio et al., 2001 |
| 766      | 40.613522<br>14.575294 | Conca dei Marini (II)<br>Site I  | SLI               | NTC           | 6.5±0.5       | 6.5±0.5       | U-series (C-1)                                  | 128±5           | 5,2                | Brancaccio et al., 1978                                                |
|          |                        |                                  |                   |               |               |               | U-series* (C-2)                                 | 87±10           |                    |                                                                        |
| 720      | 40.613522<br>14.575294 | Conca dei Marini (I)<br>Site I   | SLI               | NTC           | 7.5±0.5       | 7.5±0.5       | U-series (C-1)                                  | 128±5           | 5,2                | Brancaccio et al., 1978                                                |
|          |                        |                                  |                   |               |               |               | U-series* (C-2)                                 | 87±10           |                    |                                                                        |
| 3623     | 40.613522<br>14.575294 | Conca dei Marini (V)             | SLI               | NTC           | 2±0.5         | 2±0.5         | U-series (C-1)                                  | <128±5          | 5,2                | Riccio et al., 2001<br>Brancaccio et al., 1978                         |
|          |                        |                                  |                   |               |               |               | U-series* (C-2)                                 | <87±10          |                    |                                                                        |
| 3565     | 40.613522<br>14.575294 | Conca dei Marini (IV)<br>Site I  | SLI               | NTC           | 8±1.6         | 8±1.6         | U-series (C-1)                                  | 128±5           | 3,3                | Iannace et al., 2003<br>Brancaccio et al., 1978<br>Riccio et al., 2001 |
|          |                        |                                  |                   |               |               |               | U-series* (C-2)                                 | 87±10           |                    |                                                                        |
| 769      | 40.495303<br>15.017081 | Ponte Barizzo                    | MLI               |               | 25±2.5        |               | AAR (N/A)                                       | 130±39          | 0,3                | Brancaccio et al., 1986<br>Brancaccio et al., 1987                     |
| 770      | 40.472432<br>14.994638 | Gromola                          | MLI               |               | 13±1.3        |               | AAR (N/A)                                       | 100±30          | 0,3                | Brancaccio et al., 1986<br>Brancaccio et al., 1987                     |
| 728      | 40.245714<br>14.908187 | Licosa Cape (III)                | SLI               | MT            | 9.5±1.9       | 9.4±2.1       | U-series (Canna-2)                              | >102±4          | 4,3                | Iannace et al., 2001<br>Cinque et al., 1994                            |

| WALIS ID | Latitude Longitude     | Site                                   | Type of datapoint | RSL Indicator | Elevation (m) | Paleo RSL (m) | Dating (Original ID)                                                                         | Age (ka or MIS)                   | Quality (RSL, Age) | Reference(s)                                       |
|----------|------------------------|----------------------------------------|-------------------|---------------|---------------|---------------|----------------------------------------------------------------------------------------------|-----------------------------------|--------------------|----------------------------------------------------|
| 727      | 40.245714<br>14.908187 | Licosa Cape (II)                       | SLI               | MT            | 1.5±0.3       | 1.4±1         | U-series (Canna-2)                                                                           | <102±4                            | 5,3                | Iannace et al., 2001<br>Cinque et al., 1994        |
| 726      | 40.245714<br>14.908187 | Licosa Cape (I)                        | SLI               | MT            | 5±1           | 4.9±1.4       | U-series (Canna-2)                                                                           | 102±4                             | 4,3                | Iannace et al., 2001<br>Cinque et al., 1994        |
| 592      | 40.235994<br>14.960996 | Ogliastro Marina<br>Baia Arena         | SLI               | MT            | 7±1.4         | 6.9±1.7       | AAR (Ogliastro Marina<br>Baia Arena)                                                         | 110±33                            | 4,3                | Brancaccio et al., 1990                            |
| 593      | 40.036429<br>15.285242 | Palinuro<br>Lido Ficocella             | MLI               |               | 8±1.6         | 0±1.6         | AAR (Palinuro (Lido<br>Ficocella))                                                           | 110±33                            | 0,3                | Brancaccio et al., 1990                            |
| 732      | 40.024122<br>15.283719 | Palinuro Cape                          | SLI               | NTC           | 2.2±0.4       | 2.2±0.4       | U-series (N/A)<br>STRAT ( <i>P. latus</i> or<br>Senegalese fauna)                            | <165+55 -<br>36<br>MIS 5          | 5,4                | Antonioli et al., 1994a<br>Antonioli et al., 1994b |
| 3568     | 40.000312<br>15.426755 | The Riparo Infreschi<br>cave<br>(I)    | SLI               | LIT           | 8.9±0.6       | 8.8±0.6       | U-series (UMD180823-<br>362)<br>U-series (UME190501-<br>284)<br>U-series (UME190812-<br>343) | 120.8±1.1<br>120.4±1<br>120.2±1.7 | 5,5                | Bini et al., 2020<br>Esposito et al., 2003         |
| 3569     | 40.000312<br>15.426755 | The Riparo Infreschi<br>cave<br>(II)   | TLI               |               | 4.5±0.1       | 4.4±0.2       | U-series (UMD180823-<br>340)                                                                 | 200±2.1                           | 0,5                | Bini et al., 2020                                  |
| 3570     | 40.000312<br>15.426755 | The Riparo Infreschi<br>cave<br>(III)  | TLI               |               | 4.5±0.1       | 4.4±0.2       | U-series (UMD180823-<br>344)                                                                 | 206.2±3.2                         | 0,5                | Bini et al., 2020                                  |
| 3571     | 40.000312<br>15.426755 | The Riparo Infreschi<br>cave<br>(IV)   | TLI               |               | 4.1±0.1       | 4±0.2         | U-series (UMD180823-<br>345)                                                                 | 214.2±2.1                         | 0,5                | Bini et al., 2020                                  |
| 3572     | 40.000312<br>15.426755 | The Riparo Infreschi<br>cave<br>(V)    | TLI               |               | 4.1±0.1       | 4±0.2         | U-series (UMD180823-<br>349)                                                                 | 239.5±3.1                         | 0,5                | Bini et al., 2020                                  |
| 3573     | 40.000312<br>15.426755 | The Riparo Infreschi<br>cave<br>(VI)   | TLI               |               | 3.7±0.1       | 3.6±0.2       | U-series (UMD180823-<br>362)                                                                 | 120.8±1.1                         | 0,5                | Bini et al., 2020                                  |
| 3574     | 40.000312<br>15.426755 | The Riparo Infreschi<br>cave<br>(VII)  | TLI               |               | 3.7±0.1       | 3.6±0.2       | U-series (UME190501-<br>284)                                                                 | 120.4±1                           | 0,5                | Bini et al., 2020                                  |
| 3575     | 40.000312<br>15.426755 | The Riparo Infreschi<br>cave<br>(VIII) | TLI               |               | 3.8±0.1       | 3.7±0.2       | U-series (UME190812-<br>343)                                                                 | 120.2±1.7                         | 0,5                | Bini et al., 2020                                  |
| 3576     | 40.000312<br>15.426755 | The Riparo Infreschi<br>cave<br>(IX)   | TLI               |               | 2.7±0.1       | 2.6±0.2       | STRAT (Tephra in<br>aeolian sand)                                                            | MIS 5e                            | 0,5                | Bini et al., 2020                                  |
| 792      | 40.069976<br>15.616391 | Sapri (II)                             | SLI               | MT            | 8±1.6         | 7.8±1.9       | AAR (Sapri (Limite))                                                                         | 110±33                            | 4,3                | Brancaccio et al., 1990                            |
| 791      | 40.07138<br>15.617157  | Sapri                                  | SLI               | MT            | 15±3          | 14.8±3.2      | AAR (Sapri (Limite))                                                                         | >110±33                           | 3,3                | Brancaccio et al., 1990                            |

| WALIS ID                                     | Latitude Longitude     | Site                                         | Type of datapoint | RSL Indicator | Elevation (m) | Paleo RSL (m) | Dating (Original ID)                         | Age (ka or MIS) | Quality (RSL, Age) | Reference(s)                                                                                                                   |
|----------------------------------------------|------------------------|----------------------------------------------|-------------------|---------------|---------------|---------------|----------------------------------------------|-----------------|--------------------|--------------------------------------------------------------------------------------------------------------------------------|
| <b>Italy (Calabria)</b>                      |                        |                                              |                   |               |               |               |                                              |                 |                    |                                                                                                                                |
| 267                                          | 38.713512<br>16.119394 | Vibo Marina                                  | SLI               | MT            | 50±5          | 49.8±5.1      | U-series (A)                                 | 122.4±36.7      | 2,3                | Bianca et al., 2011<br>Dai Pra et al., 1993<br>Pata, 1947<br>Roberts et a., 2013<br>Balescu et al., 1997<br>Dumas et al., 1991 |
|                                              |                        |                                              |                   |               |               |               | U-series (B)                                 | 119±35.7        |                    |                                                                                                                                |
|                                              |                        |                                              |                   |               |               |               | U-series (VV1w)                              | 132±1.6         |                    |                                                                                                                                |
|                                              |                        |                                              |                   |               |               |               | U-series (VV1s)                              | 142±1.8         |                    |                                                                                                                                |
|                                              |                        |                                              |                   |               |               |               | U-series (N/A)                               | 130±8           |                    |                                                                                                                                |
|                                              |                        |                                              |                   |               |               |               | AAR (Vibo Marina)                            | MIS 5e          |                    |                                                                                                                                |
|                                              |                        |                                              |                   |               |               |               | LUM (TB)                                     | 94±8            |                    |                                                                                                                                |
|                                              |                        |                                              |                   |               |               |               | LUM (VM21)                                   | 192±19          |                    |                                                                                                                                |
| STRAT ( <i>P. latus</i> or Senegalese fauna) | MIS 5                  |                                              |                   |               |               |               |                                              |                 |                    |                                                                                                                                |
| 315                                          | 38.706274<br>16.046311 | Paradisoni                                   | SLI               | MT            | 140±0.2       | 139.8±0.9     | AAR (Paradisoni)                             | MIS 5e          | 4,4                | Balescu et al., 1997                                                                                                           |
|                                              |                        |                                              |                   |               |               |               | LUM (PA21)                                   | 128±13          |                    |                                                                                                                                |
|                                              |                        |                                              |                   |               |               |               | LUM (PA21)                                   | 104±8           |                    |                                                                                                                                |
| 316                                          | 38.710179<br>16.036594 | Sacco                                        | SLI               | MT            | 153±15.3      | 152.8±15.3    | LUM (SC21)                                   | 134±13          | 2,2                | Balescu et al., 1997                                                                                                           |
| 268                                          | 38.724333<br>16.0333   | Briatico                                     | SLI               | MT            | 100±10        | 99.9±10       | LUM (TB)                                     | 94±8            | 2,2                | Bianca et al., 2011                                                                                                            |
| 269                                          | 38.61922<br>15.829895  | Capo Vaticano                                | SLI               | MT            | 175±17.4      | 174.9±17.4    | LUM (TB)                                     | 94±8            | 2,2                | Bianca et al., 2011                                                                                                            |
| 270                                          | 38.552123<br>15.930741 | Nicotera                                     | SLI               | MT            | 125±1         | 124.9±1.3     | LUM (TB)                                     | 94±8            | 2,2                | Bianca et al., 2011                                                                                                            |
| 3431                                         | 38.55<br>15.94         | Gioia Tauro Contrada Ianni (nearby Nicotera) | SLI               | MT            | 80±8          | 79.9±8        | STRAT ( <i>P. latus</i> or Senegalese fauna) | MIS 5           | 2,3                | Bonfiglio et al., 1988<br>Miyachi et al., 1994                                                                                 |
| 3430                                         | 38.529562<br>16.040374 | Gioia Tauro basin                            | SLI               | MT            | 65±6.5        | 64.9±6.5      | STRAT ( <i>P. latus</i> or Senegalese fauna) | MIS 5           | 2,3                | Cosentino & Gliozzi, 1988                                                                                                      |
| 314                                          | 38.481234<br>15.956639 | Rosarno                                      | SLI               | MT            | 80±8          | 79.9±8        | LUM (RO21)                                   | 140±13          | 2,2                | Balescu et al., 1997                                                                                                           |
| 304                                          | 38.078356<br>15.639365 | Ravagnese                                    | SLI               | MT            | 129±12.9      | 128.9±12.9    | AAR (Ravagnese)                              | MIS 5e          | 3,5                | Balescu et al., 1997<br>Dumas et al., 1988<br>Gignoux, 1913                                                                    |
|                                              |                        |                                              |                   |               |               |               | AAR (Ravagnese)                              | MIS 5e          |                    |                                                                                                                                |
|                                              |                        |                                              |                   |               |               |               | AAR (RSH2)                                   | MIS 5e          |                    |                                                                                                                                |
|                                              |                        |                                              |                   |               |               |               | AAR (RSH2)                                   | MIS 5e          |                    |                                                                                                                                |
|                                              |                        |                                              |                   |               |               |               | AAR (RA3)                                    | MIS 5e          |                    |                                                                                                                                |



| WALIS ID | Latitude Longitude     | Site          | Type of datapoint | RSL Indicator | Elevation (m) | Paleo RSL (m) | Dating (Original ID)                         | Age (ka or MIS) | Quality (RSL, Age) | Reference(s)         |
|----------|------------------------|---------------|-------------------|---------------|---------------|---------------|----------------------------------------------|-----------------|--------------------|----------------------|
|          |                        |               |                   |               |               |               | AAR (RA3)                                    | MIS 5e          |                    |                      |
|          |                        |               |                   |               |               |               | AAR (RA4)                                    | MIS 5e          |                    |                      |
|          |                        |               |                   |               |               |               | AAR (RA2)                                    | MIS 5e          |                    |                      |
|          |                        |               |                   |               |               |               | AAR (RA2)                                    | MIS 5e          |                    |                      |
|          |                        |               |                   |               |               |               | AAR (CA1)                                    | MIS 5e          |                    |                      |
|          |                        |               |                   |               |               |               | LUM (RA21)                                   | 116±13          |                    |                      |
|          |                        |               |                   |               |               |               | LUM (RA22)                                   | 101±12          |                    |                      |
|          |                        |               |                   |               |               |               | LUM (RA21)                                   | 102±8           |                    |                      |
|          |                        |               |                   |               |               |               | STRAT ( <i>P. latus</i> or Senegalese fauna) | MIS 5           |                    |                      |
| 312      | 38.066454<br>15.659182 | Trombaca      | SLI               | MT            | 116±11.6      | 115.9±11.6    | AAR (Trombaca)                               | MIS 5e          | 2,3                | Balescu et al., 1997 |
|          |                        |               |                   |               |               |               | LUM (TR21)                                   | 79±8            | 2,3                |                      |
|          |                        |               |                   |               |               |               | LUM (TR21)                                   | 90±9            | 2,3                |                      |
| 306      | 38.058666<br>15.661343 | Bovetto       | SLI               | MT            | 129±12.9      | 128.9±12.9    | AAR (Bovetto)                                | MIS 5e          |                    |                      |
|          |                        |               |                   |               |               |               | AAR (Bovetto)                                | MIS 5e          |                    |                      |
|          |                        |               |                   |               |               |               | AAR (RSHx)                                   | MIS 5e          |                    |                      |
|          |                        |               |                   |               |               |               | AAR (RSHz)                                   | MIS 5e          |                    |                      |
|          |                        |               |                   |               |               |               | AAR (RSHz)                                   | MIS 5e          |                    |                      |
|          |                        |               |                   |               |               |               | AAR (RSHz)                                   | MIS 5e          |                    |                      |
|          |                        |               |                   |               |               |               | AAR (RSH1b)                                  | MIS 5e          |                    |                      |
|          |                        |               |                   |               |               |               | AAR (RSH1b)                                  | MIS 5e          |                    |                      |
|          |                        |               |                   |               |               |               | AAR (RSH1b)                                  | MIS 5e          |                    |                      |
|          |                        |               |                   |               |               |               | AAR (RSH1a)                                  | MIS 5e          |                    |                      |
|          |                        |               |                   |               |               |               | AAR (RSH1c)                                  | MIS 5e          |                    |                      |
|          |                        |               |                   |               |               |               | AAR (RSH1d)                                  | MIS 5e          |                    |                      |
|          |                        |               |                   |               |               |               | LUM (BO21)                                   | 116±12          |                    |                      |
|          |                        |               |                   |               |               |               | STRAT ( <i>P. latus</i> or Senegalese fauna) | MIS 5           |                    |                      |
| 4065     | 38.063325<br>15.675959 | Trombaca (II) | SLI               | MT            | 100±10        | 99.9±10       | AAR (TR1)                                    | MIS 5c          | 2,3                | Dumas et al., 1988   |
| 4066     |                        | Traietta      | SLI               | MT            | 83±8.3        | 82.9±8.3      | AAR (RA1)                                    | MIS 5a          | 2,2                | Dumas et al., 1988   |

| WALIS ID | Latitude Longitude     | Site                  | Type of datapoint | RSL Indicator | Elevation (m) | Paleo RSL (m) | Dating (Original ID)                         | Age (ka or MIS) | Quality (RSL, Age) | Reference(s)                                                      |
|----------|------------------------|-----------------------|-------------------|---------------|---------------|---------------|----------------------------------------------|-----------------|--------------------|-------------------------------------------------------------------|
|          | 38.066238<br>15.67265  |                       |                   |               |               |               | AAR (RA1)                                    | MIS 5a          |                    |                                                                   |
| 4067     | 38.057435<br>15.681235 | Rione Branca          | SLI               | MT            | 76±7.6        | 75.9±7.6      | AAR (RB1)                                    | MIS 5a          | 2,2                | Dumas et al., 1988                                                |
| 1378     | 38.04588<br>15.678569  | Nocella Pellaro       | SLI               | MT            | 166±16.6      | 165.9±16.6    | AAR (Nocella)                                | MIS 5e          | 2,2                | Dumas et al., 1988<br>Dumas 1987<br>Balescu et al., 1997          |
|          |                        |                       |                   |               |               |               | AAR (Nocella)                                | MIS 7           |                    |                                                                   |
|          |                        |                       |                   |               |               |               | STRAT ( <i>P. latus</i> or Senegalese fauna) | MIS 5           |                    |                                                                   |
| 4062     | 38.00714<br>15.64512   | Nocella (II) Pellaro  | SLI               | MT            | 105±10.5      | 104.9±10.5    | STRAT ( <i>P. latus</i> or Senegalese fauna) | MIS 5           | 2,2                | Dumas et al., 1988<br>Dumas 1987                                  |
| 313      | 37.956035<br>15.683487 | Altibano              | SLI               | MT            | 198±0.2       | 197.9±0.7     | AAR (Altibano)                               | MIS 7           | 4,2                | Balescu et al., 1997<br>Dumas et al., 1988                        |
|          |                        |                       |                   |               |               |               | AAR (AB1)                                    | MIS 5e          |                    |                                                                   |
|          |                        |                       |                   |               |               |               | LUM (AB21)                                   | 118±13          |                    |                                                                   |
| 563      | 38.952446<br>16.983983 | San Leonardo di Cutro | SLI               | MT            | 83±8.3        | 82.9±8.3      | LUM (SlcC 1)                                 | 121±15          | 2,3                | Mauz and Hassler, 2000                                            |
|          |                        |                       |                   |               |               |               | LUM (SlcC 1)                                 | 142±20          |                    |                                                                   |
| 4068     | 38.926101<br>17.006657 | Campolongo            | SLI               | MT            | 90±9          | 89.9±9        | AAR (Campolongo 32)                          | 110±33          | 2,3                | Belluomini et al., 1988<br>Nalin et al., 2020                     |
| 4069     | 38.913225<br>17.029234 | Le Castella           | SLI               | MT            | 90±9          | 89.9±9        | AAR (Le Castella 45)                         | 110±33          | 2,3                | Belluomini et al., 1988<br>Nalin et al., 2020                     |
| 566      | 39.030593<br>17.000421 | Manca della Vozza     | SLI               | MT            | 240±24        | 239.1±24      | AAR (Manca della Vozza 13)                   | MIS 7           | 2,3                | Mauz and Hassler, 2000<br>Belluomini et al., 1988                 |
|          |                        |                       |                   |               |               |               | LUM (MdV)                                    | >90±10          |                    |                                                                   |
|          |                        |                       |                   |               |               |               | LUM (MdV)                                    | >85±10          |                    |                                                                   |
| 565      | 38.956174<br>17.085881 | Isola di Capo Rizzuto | SLI               | MT            | 81±8.1        | 80.9±8.2      | AAR (Isola Capo Rizzuto 8)                   | <110±33         | 2,2                | Mauz and Hassler, 2000<br>Belluomini et al., 1988                 |
|          |                        |                       |                   |               |               |               | LUM (IdCR05)                                 | >98±7           |                    |                                                                   |
|          |                        |                       |                   |               |               |               | LUM (IdCR03)                                 | >82±12          |                    |                                                                   |
|          |                        |                       |                   |               |               |               | LUM (IdCR03)                                 | >149±64         |                    |                                                                   |
| 564      | 38.904516<br>17.094202 | Capo Rizzuto          | SLI               | MT            | 18±3.6        | 17.9±3.7      | AAR (Capo Rizzuto 1c)                        | 110±33          | 2,3                | Mauz and Hassler, 2000<br>Belluomini et al., 1988<br>Gliozzi 1987 |
|          |                        |                       |                   |               |               |               | AAR (Capo Rizzuto 9)                         | 110±33          |                    |                                                                   |
|          |                        |                       |                   |               |               |               | LUM (CR2)                                    | 86±9            |                    |                                                                   |
|          |                        |                       |                   |               |               |               | LUM (CR2)                                    | 65±6            |                    |                                                                   |
| 3428     | 38.959999<br>17.139995 | Crotone (II)          | SLI               | MT            | 110±11        | 109.9±11      | STRAT ( <i>P. latus</i> or Senegalese fauna) | MIS 5           | 2,3                | Cosentino & Gliozzi, 1988                                         |
| 1379     | 38.959958<br>17.14032  | Crotone               | SLI               | MT            | 84±8.4        | 83.9±8.5      | STRAT ( <i>P. latus</i> or Senegalese fauna) | MIS 5           | 2,3                | Palmentola et al., 1990                                           |

| WALIS ID                  | Latitude<br>Longitude  | Site                            | Type of datapoint | RSL Indicator | Elevation (m) | Paleo RSL (m) | Dating (Original ID)                         | Age (ka or MIS) | Quality (RSL, Age) | Reference(s)                                                              |
|---------------------------|------------------------|---------------------------------|-------------------|---------------|---------------|---------------|----------------------------------------------|-----------------|--------------------|---------------------------------------------------------------------------|
| 3634                      | 39.020459<br>17.175222 | Capo Colonna Terrace            | SLI               | MT            | 35±7          | 34.9±7.1      | AAR (Capo Colonne 3)                         | 70±21           | 1,2                | Nalin et al., 2012<br>Belluomini et al., 1988<br>Palmentola et al., 1990  |
|                           |                        |                                 |                   |               |               |               | STRAT ( <i>P. latus</i> or Senegalese fauna) | MIS 5           |                    |                                                                           |
| 442                       | 39.611016<br>16.445736 | Vaccarizzo                      | SLI               | MT            | 125±12.5      | 124.9±12.5    | ESR (K-5355)                                 | 135±20          | 3,2                | Santoro et al., 2009                                                      |
| 324                       | 39.871248<br>16.523172 | Trebisacce                      | SLI               | MT            | 128±12.8      | 127.9±12.8    | AAR* (1)                                     | 139±41.7        | 3,3                | Cucci, 2004                                                               |
|                           |                        |                                 |                   |               |               |               | AAR (2)                                      | 130±39          |                    |                                                                           |
| <b>Italy (Basilicata)</b> |                        |                                 |                   |               |               |               |                                              |                 |                    |                                                                           |
| 416                       | 40.139879<br>16.651067 | Piano San Nicola                | SLI               | MT            | 90±9          | 90±9          | AAR (Site No 1)                              | MIS 5a          | 2,2                | Hearty and Dai Pra, 1992 Journal of Coastal Research                      |
| 4061                      | 40.32933<br>16.747113  | Metaponto (ii)<br>San Teodoro I | SLI               | MT            | 42±6.4        | 41.9±6.4      | U-series (BR80-001)                          | >75±3.3         | 4,2                | Brückner, 1980<br>Sauer et al., 2010<br>Zander et al., 2006               |
|                           |                        |                                 |                   |               |               |               | U-series (BR80-002)                          | >110±10         |                    |                                                                           |
| 4060                      | 40.353955<br>16.777243 | Metaponto<br>Petrulla           | SLI               | MT            | 22±2.4        | 21.9±2.5      | U-series (BR80-001)                          | 75±7            | 4,2                | Brückner, 1980<br>Sauer et al., 2010<br>Zander et al., 2006               |
|                           |                        |                                 |                   |               |               |               | U-series (BR80-002)                          | 110±10          |                    |                                                                           |
| <b>Italy (Puglia)</b>     |                        |                                 |                   |               |               |               |                                              |                 |                    |                                                                           |
| 355                       | 40.515244<br>16.938602 | Ponte del Re                    | SLI               | MT            | 45±4.5        | 44.3±4.5      | AAR (Site No 2)                              | MIS 5e          | 2,3                | Boenzi et al., 1985<br>Dai Pra & Hearty, 1988<br>Hearty and Dai Pra, 1992 |
|                           |                        |                                 |                   |               |               |               | AAR (Site No 2)                              | MIS 5e          |                    |                                                                           |
|                           |                        |                                 |                   |               |               |               | AAR (Site No 2)                              | MIS 5e          |                    |                                                                           |
|                           |                        |                                 |                   |               |               |               | STRAT ( <i>P. latus</i> or Senegalese fauna) | MIS 5           |                    |                                                                           |
| 3631                      | 40.52951<br>17.172215  | Ponte Romano<br>Taranto         | SLI               | MT            | 37±2          | 36.9±2.1      | U-series (PR1 [6468])                        | 107.7±1.5       | 4,3                | Mastronuzzi & Sansò, 2003<br>Mastronuzzi & Sansò, 2002                    |
|                           |                        |                                 |                   |               |               |               | LUM (N/A)                                    | 93±8            |                    |                                                                           |
|                           |                        |                                 |                   |               |               |               | STRAT ( <i>P. latus</i> or Senegalese fauna) | MIS 5           |                    |                                                                           |
| 697                       | 40.531944<br>17.183889 | Masseria S. Giovanni<br>Taranto | SLI               | MT            | 32.5±6.5      | 32.4±6.5      | U-series (LJ402)                             | 142±14          | 2,3                | Dai Pra and Stearns, 1977                                                 |
| 224                       | 40.478337<br>17.179617 | Punta Rondinella                | MLI               |               | 1.5±0.2       |               | U-series (PR)                                | MIS 5a          | 0,1                | Belluomini et al., 2002                                                   |
|                           |                        |                                 |                   |               |               |               | AAR (PR)                                     | MIS 5a          |                    |                                                                           |
|                           |                        |                                 |                   |               |               |               | AAR (PR)                                     | MIS 3           |                    |                                                                           |
| 225                       | 40.457552<br>17.161104 | Punta lo Scanno                 | SLI               | BRK           | 2±0.2         | 2.1±0.5       | U-series (ISP2)                              | 86.4±4.2        | 3,1                | Belluomini et al., 2002                                                   |
|                           |                        |                                 |                   |               |               |               | U-series (ISP2)                              | MIS 3           |                    |                                                                           |
|                           |                        |                                 |                   |               |               |               | AAR (ISP2)                                   | MIS 5a          |                    |                                                                           |
|                           |                        |                                 |                   |               |               |               | AAR (ISP2)                                   | MIS 3           |                    |                                                                           |
|                           |                        |                                 |                   |               |               |               | AAR (ISP2)                                   | MIS 3           |                    |                                                                           |

| WALIS ID          | Latitude Longitude     | Site                          | Type of datapoint | RSL Indicator | Elevation (m) | Paleo RSL (m) | Dating (Original ID)                         | Age (ka or MIS) | Quality (RSL, Age) | Reference(s)                                                                                                                           |
|-------------------|------------------------|-------------------------------|-------------------|---------------|---------------|---------------|----------------------------------------------|-----------------|--------------------|----------------------------------------------------------------------------------------------------------------------------------------|
| 228               | 40.453135<br>17.157284 | Apodonia                      | MLI               |               | 0.6±0.2       |               | U-series (ISP4)                              | MIS 5e          | 0,2                | Belluomini et al., 2002                                                                                                                |
| 3632              | 40.484115<br>17.220128 | Masseria Ruggiero Taranto     | MLI               |               | 18±3.6        |               | STRAT ( <i>P. latus</i> or Senegalese fauna) | MIS 5           | 0,3                | Mastronuzzi & Sansò, 2003                                                                                                              |
| 704               | 40.497194<br>17.239483 | Masseria Bagnara              | MLI               |               | 14±2.8        |               | U-series (N/A)                               | 134±16          | 0,4                | Dai Pra & Hearty, 1988                                                                                                                 |
|                   |                        |                               |                   |               |               |               | AAR (N/A)                                    | MIS 5e          |                    |                                                                                                                                        |
|                   |                        |                               |                   |               |               |               | AAR (N/A)                                    | MIS 5e          |                    |                                                                                                                                        |
| 223               | 40.501098<br>17.24893  | Masseria Santa Teresiola      | SLI               | BRK           | 9.3±0.3       | 9.3±0.6       | U-series (MP7)                               | 89.8±4.8        | 4,3                | Belluomini et al., 2002<br>Dai Pra & Hearty, 1988                                                                                      |
| 3630              | 40.501098<br>17.24893  | Masseria Santa Teresiola (II) | SLI               | BRK           | 28±5.6        | 28±5.6        | U-series (N/A)                               | 162±48.6        | 2,4                | Dai Pra & Hearty, 1988<br>Cotecchia et al., 1969<br>Dai Pra and Stearns, 1977<br>Hearty and Dai Pra, 1992<br>Mastronuzzi & Sansò, 2003 |
|                   |                        |                               |                   |               |               |               | U-series (N/A)                               | 125±8           |                    |                                                                                                                                        |
|                   |                        |                               |                   |               |               |               | STRAT ( <i>P. latus</i> or Senegalese fauna) | MIS 5           |                    |                                                                                                                                        |
| 699               | 40.50924<br>17.317213  | Masseria San Pietro           | SLI               | MT            | 28±5.6        | 27.9±5.6      | AAR (MII Sb)                                 | MIS 5e          | 2,2                | Dai Pra and Stearns, 1977<br>Hearty and Dai Pra, 1992<br>Hearty et al., 1985                                                           |
|                   |                        |                               |                   |               |               |               | STRAT ( <i>P. latus</i> or Senegalese fauna) | MIS 5           |                    |                                                                                                                                        |
| 230               | 40.473951<br>17.310684 | Il Fronte                     | MLI               |               | 7.5±0.5       |               | U-series (FW11-C1-A)                         | 130.6±1.2       | 0,4                | Amorosi et al., 2014<br>Dai Pra & Hearty, 1988<br>Dai Pra and Stearns, 1977<br>Hearty et al., 1986                                     |
|                   |                        |                               |                   |               |               |               | U-series (FW11-C1-B)                         | 134.8±0.9       |                    |                                                                                                                                        |
|                   |                        |                               |                   |               |               |               | U-series (FW11-C1-c)                         | 139.9±2.9       |                    |                                                                                                                                        |
|                   |                        |                               |                   |               |               |               | U-series (FW11-C1-D)                         | 138±3.1         |                    |                                                                                                                                        |
|                   |                        |                               |                   |               |               |               | U-series (FW11-C1-E)                         | 131.5±2.4       |                    |                                                                                                                                        |
|                   |                        |                               |                   |               |               |               | U-series (FW11-C1-F)                         | 146.9±3.4       |                    |                                                                                                                                        |
|                   |                        |                               |                   |               |               |               | U-series (FW11-C2-A)                         | 123.7±1.4       |                    |                                                                                                                                        |
|                   |                        |                               |                   |               |               |               | U-series (FW11-C2-B)                         | 125.1±0.8       |                    |                                                                                                                                        |
|                   |                        |                               |                   |               |               |               | U-series (FW11-C2-C)                         | 121±2.1         |                    |                                                                                                                                        |
|                   |                        |                               |                   |               |               |               | U-series (FW11-C2-D)                         | 124.9±2.7       |                    |                                                                                                                                        |
|                   |                        |                               |                   |               |               |               | U-series (LJ483)                             | 87±4            |                    |                                                                                                                                        |
|                   |                        |                               |                   |               |               |               | U-series (LJ481)                             | 106±8           |                    |                                                                                                                                        |
|                   |                        |                               |                   |               |               |               | U-series (LJ505)                             | 130±10          |                    |                                                                                                                                        |
|                   |                        |                               |                   |               |               |               | U-series (LJ487)                             | 154±13          |                    |                                                                                                                                        |
|                   |                        |                               |                   |               |               |               | U-series (TSh5b2)                            | 117±7           |                    |                                                                                                                                        |
| U-series (TSh5b2) | 128±7                  |                               |                   |               |               |               |                                              |                 |                    |                                                                                                                                        |
| U-series (TSh5a)  | 121±6                  |                               |                   |               |               |               |                                              |                 |                    |                                                                                                                                        |

| WALIS ID | Latitude Longitude     | Site                                                | Type of datapoint | RSL Indicator | Elevation (m) | Paleo RSL (m) | Dating (Original ID)                         | Age (ka or MIS) | Quality (RSL, Age) | Reference(s)                                                                                                                     |
|----------|------------------------|-----------------------------------------------------|-------------------|---------------|---------------|---------------|----------------------------------------------|-----------------|--------------------|----------------------------------------------------------------------------------------------------------------------------------|
|          |                        |                                                     |                   |               |               |               | AAR (N/A)                                    | MIS 5e          |                    |                                                                                                                                  |
|          |                        |                                                     |                   |               |               |               | STRAT ( <i>P. latus</i> or Senegalese fauna) | MIS 5           |                    |                                                                                                                                  |
| 701      | 40.471535<br>17.30819  | Masseria Pantaleo                                   | MLI               |               | 11±2.2        |               | U-series (LJ438)                             | 142±14          | 0,3                | Dai Pra and Stearns, 1977                                                                                                        |
|          |                        |                                                     |                   |               |               |               | U-series (LJ439)                             | 146±12          |                    |                                                                                                                                  |
| 698      | 40.399548<br>17.252443 | Carelli<br>Between Carelli and Saturo harbour       | SLI               | MT            | 20±4          | 19.9±4.1      | U-series (LJ425)                             | 138±14          | 2,4                | Dai Pra and Stearns, 1977<br>Hearty and Dai Pra, 1992 Journal of Coastal Research<br>Hearty et al., 1985                         |
|          |                        |                                                     |                   |               |               |               | AAR (MIV)                                    | <MIS 5          |                    |                                                                                                                                  |
|          |                        |                                                     |                   |               |               |               | AAR (MIV)                                    | <MIS 5          |                    |                                                                                                                                  |
|          |                        |                                                     |                   |               |               |               | STRAT ( <i>P. latus</i> or Senegalese fauna) | MIS 5           |                    |                                                                                                                                  |
| 700      | 40.399548<br>17.252443 | Il Posto<br>Between Il Posto and Torre Castelluccia | SLI               | MT            | 29±5.8        | 28.9±5.8      | U-series (SV16)                              | 139.6±4.5       | 2,4                | Dai Pra and Stearns, 1977<br>Belluomini et al., 2002<br>Hearty and Dai Pra, 1992<br>Hearty et al., 1985                          |
|          |                        |                                                     |                   |               |               |               | U-series (LJ425)                             | 138±14          |                    |                                                                                                                                  |
|          |                        |                                                     |                   |               |               |               | AAR (SV16)                                   | MIS 5e          |                    |                                                                                                                                  |
|          |                        |                                                     |                   |               |               |               | AAR (SV2)                                    | MIS 5c          |                    |                                                                                                                                  |
|          |                        |                                                     |                   |               |               |               | AAR (MIII)                                   | MIS 5e          |                    |                                                                                                                                  |
|          |                        |                                                     |                   |               |               |               | STRAT ( <i>P. latus</i> or Senegalese fauna) | MIS 5           |                    |                                                                                                                                  |
| 226      | 40.361735<br>17.325993 | Punta della Baracca                                 | SLI               | BRK           | 3.5±0.2       | 3.6±0.5       | U-series (SV16)                              | 139.6±4.5       | 3,4                | Belluomini et al., 2002                                                                                                          |
| 705      | 40.342522<br>17.380951 | Torre Castelluccia                                  | SLI               | BRK           | 3±0.6         | 3.2±0.8       | AAR (N/A)                                    | MIS 5c          | 4,3                | Dai Pra & Hearty, 1988                                                                                                           |
| 695      | 40.375273<br>17.428416 | Lizzano                                             | SLI               | MT            | 28±5.6        | 27.9±5.7      | STRAT ( <i>P. latus</i> or Senegalese fauna) | MIS 5           | 2,2                | Dai Pra and Stearns, 1977                                                                                                        |
| 696      | 40.287224<br>17.819483 | Torre Castiglione                                   | SLI               | MT            | 2.5±0.5       | 2.4±1         | U-series (LJ423)                             | 156±20          | 4,1                | Dai Pra and Stearns, 1977                                                                                                        |
|          |                        |                                                     |                   |               |               |               | STRAT ( <i>P. latus</i> or Senegalese fauna) | MIS 5           |                    |                                                                                                                                  |
| 3625     | 40.07983<br>18.007961  | Torre Sabea<br>Gallipoli                            | SLI               | BRK           | 3±0.6         | 3±0.6         | U-series (N/A)                               | 115±11          | 4,4                | Cotecchia et al., 1969<br>Dai Pra & Hearty, 1988<br>Hearty and Dai Pra, 1992<br>Hearty et al., 1985                              |
|          |                        |                                                     |                   |               |               |               | AAR (MIII Sb)                                | MIS 5e          |                    |                                                                                                                                  |
|          |                        |                                                     |                   |               |               |               | STRAT ( <i>P. latus</i> or Senegalese fauna) | MIS 5           |                    |                                                                                                                                  |
| 3627     | 40.064652<br>17.995678 | Gallipoli                                           | SLI               | BRK           | 10±2          | 10±2          | AAR (MIIIb Sb)                               | MIS 5e          | 4,3                | Cotecchia et al., 1969<br>Dai Pra & Hearty, 1988<br>Hearty and Dai Pra, 1992<br>Hearty et al., 1985<br>Mastronuzzi & Sansò, 2003 |
|          |                        |                                                     |                   |               |               |               | AAR (MIIIa)                                  | MIS 5e          |                    |                                                                                                                                  |
|          |                        |                                                     |                   |               |               |               | AAR (MIII)                                   | MIS 5e          |                    |                                                                                                                                  |
|          |                        |                                                     |                   |               |               |               | AAR (MIIIa)                                  | MIS 5e          |                    |                                                                                                                                  |

| WALIS ID              | Latitude<br>Longitude  | Site                                                                                       | Type of datapoint | RSL Indicator | Elevation (m) | Paleo RSL (m) | Dating (Original ID)                             | Age (ka or MIS) | Quality (RSL, Age) | Reference(s)                                                                                                                     |
|-----------------------|------------------------|--------------------------------------------------------------------------------------------|-------------------|---------------|---------------|---------------|--------------------------------------------------|-----------------|--------------------|----------------------------------------------------------------------------------------------------------------------------------|
|                       |                        |                                                                                            |                   |               |               |               | STRAT ( <i>P. latus</i> or Senegalese fauna)     | MIS 5           |                    |                                                                                                                                  |
| 3628                  | 40.050975<br>18.001356 | Torre San Giovanni Gallipoli                                                               | SLI               | BRK           | 8±1.6         | 8±1.6         | AAR (DI)                                         | >MIS 5a         | 5,3                | Cotecchia et al., 1969<br>Dai Pra & Hearty, 1988<br>Hearty and Dai Pra, 1992<br>Hearty et al., 1985<br>Mastronuzzi & Sansò, 2003 |
|                       |                        |                                                                                            |                   |               |               |               | AAR (SI)                                         | >MIS 5a         |                    |                                                                                                                                  |
|                       |                        |                                                                                            |                   |               |               |               | AAR (SII)                                        | >MIS 5c         |                    |                                                                                                                                  |
|                       |                        |                                                                                            |                   |               |               |               | AAR (MIII Sb)                                    | >MIS 5          |                    |                                                                                                                                  |
|                       |                        |                                                                                            |                   |               |               |               | STRAT ( <i>P. latus</i> or Senegalese fauna)     | MIS 5           |                    |                                                                                                                                  |
| 3635                  | 39.79143<br>18.343804  | Grotta del Diavolo                                                                         | SLI               | BRK           | 3±0.6         | 3.3±1         | U-series (6715)                                  | >77±23.1        | 5,2                | Mastronuzzi et al., 2007                                                                                                         |
| 1324                  | 39.855<br>18.391       | Marina di Novaglie Southern Site                                                           | SLI               | MT            | 25±15         | 20±15         | STRAT ( <i>P. latus</i> or Senegalese fauna)     | MIS 5           | 1,2                | Ferranti et al., 2006<br>Parroni & Silenzi, 1997                                                                                 |
| 1323                  | 39.862<br>18.394       | Marina di Novaglie Northern Site                                                           | SLI               | MT            | 25±15         | 20±15         | STRAT ( <i>P. latus</i> or Senegalese fauna)     | MIS 5           | 1,2                | Ferranti et al., 2006<br>Parroni & Silenzi, 1997                                                                                 |
| 1319                  | 40.017<br>18.434       | Grotta Romanelli                                                                           | SLI               | BRK           | 9.8±0.1       | 7.8±0.1       | STRAT ( <i>P. latus</i> or Senegalese fauna)     | MIS 5           | 4,3                | Cosentino & Gliozzi, 1988<br>Bordoni & Valensise 1999<br>Ferranti et al., 2006                                                   |
| 1320                  | 40.046433<br>18.476133 | Grotta delle Striare                                                                       | SLI               | NTC           | 8.2±0.3       | 7.2±0.3       | STRAT ( <i>P. latus</i> or Senegalese fauna)     | MIS 5           | 5,3                | Antonioli et al., 2018                                                                                                           |
| 1321                  | 40.717<br>17.799       | Torre Mattarelle - Torre Guaceto                                                           | SLI               | BRK           | 4±2           | 2±2           | STRAT ( <i>P. latus</i> or Senegalese fauna)     | MIS 5           | 3,3                | Ferranti et al., 2006<br>Bordoni and Valensise, 1999                                                                             |
| 1322                  | 40.76<br>17.704        | Torre Santa Sabina                                                                         | SLI               | BRK           | 3±2           | 1±2           | STRAT ( <i>P. latus</i> or Senegalese fauna)     | MIS 5           | 4,3                | Ferranti et al., 2006<br>Bordoni & Valensise 1999                                                                                |
| 1318                  | 40.815<br>17.504       | Villanova-Monopoli                                                                         | MLI               |               | 30±3          | 0±0           | STRAT ( <i>P. latus</i> or Senegalese fauna)     | MIS 5           | 0,3                | Antonioli et al., 2009<br>Bordoni & Valensise 1999<br>Mastronuzzi et al., 1989                                                   |
| 452                   | 41.506891<br>15.905839 | MM4 borehole Unit 13                                                                       | MLI               |               | -8±1.6        |               | AAR (MM4/3)                                      | 70±19           | 0,2                | De Santis et al., 2010                                                                                                           |
|                       |                        |                                                                                            |                   |               |               |               | AAR (MM4/3)                                      | 70±19           |                    |                                                                                                                                  |
| 453                   | 41.506891<br>15.905839 | MM4 borehole Unit 11                                                                       | MLI               |               | -13±2.6       |               | AAR (MM4/6)                                      | 98±17           | 0,3                | De Santis et al., 2010                                                                                                           |
|                       |                        |                                                                                            |                   |               |               |               | AAR (MM4/6)                                      | 98±17           |                    |                                                                                                                                  |
| 454                   | 41.506891<br>15.905839 | MM4 borehole Unit 10                                                                       | MLI               |               | -22±4.4       |               | STRAT (RPL Unit 10)                              | MIS 5e          | 0,2                | De Santis et al., 2010                                                                                                           |
| 1317                  | 41.881<br>15.287       | Fortore River<br>The site is near the mouth of Fortore River, near the village of Ripalta. | TLI               |               | 25±10         |               | STRAT (Tyrrhenian Adriatic (Eemian pollen unit)) | MIS 5e          | 2,2                | Bordoni & Valensise 1999<br>Antonioli et al., 2009                                                                               |
| <b>Italy (Marche)</b> |                        |                                                                                            |                   |               |               |               |                                                  |                 |                    |                                                                                                                                  |
| 1333                  | 43.72<br>13.295        | Metauro River                                                                              | SLI               | MT            | 15±1          | 12±1          | STRAT (Tyrrhenian Adriatic (Eemian pollen unit)) | MIS 5e          | 0,0                | Ferranti et al., 2006                                                                                                            |

| WALIS ID                      | Latitude Longitude     | Site                                                                                                                 | Type of datapoint | RSL Indicator | Elevation (m) | Paleo RSL (m) | Dating (Original ID)                             | Age (ka or MIS) | Quality (RSL, Age) | Reference(s)                                                        |
|-------------------------------|------------------------|----------------------------------------------------------------------------------------------------------------------|-------------------|---------------|---------------|---------------|--------------------------------------------------|-----------------|--------------------|---------------------------------------------------------------------|
| 1332                          | 43.78<br>13.104        | Arzilla River                                                                                                        | SLI               | MT            | 15±1          | 12±1          | STRAT (Tyrrhenian Adriatic (Eemian pollen unit)) | MIS 5e          | 0,0                | Ferranti et al., 2006                                               |
| <b>Italy (Emilia Romagna)</b> |                        |                                                                                                                      |                   |               |               |               |                                                  |                 |                    |                                                                     |
| 1331                          | 43.982<br>12.675       | Conca River                                                                                                          | SLI               | MT            | 16±1          | 13±1          | STRAT (Tyrrhenian Adriatic (Eemian pollen unit)) | MIS 5e          | 0,0                | Ferranti et al., 2006                                               |
| 1330                          | 44.086091<br>12.536547 | 256-S3 Viserba<br>Core S3 of geological map, sheet 256 "Rimini", near Viserba; ground at +1.5 m asl.                 | SLI               | BRK           | -78.9±1       | -78.9±10      | STRAT (Tyrrhenian Adriatic (Eemian pollen unit)) | MIS 5e          | 3,3                | Amorosi et al., 2004<br>Campo et al., 2020                          |
| 1329                          | 44.162311<br>12.209142 | 255-S4 Cesena<br>Core S4 of geological map sheet 255 "Cesena", near Cesena; ground +33.5 m asl.                      | TLI               |               | -11.5±1       | 0±0           | STRAT (Tyrrhenian Adriatic (Eemian pollen unit)) | MIS 5e          | 0,3                | Campo et al., 2020<br>Amorosi et al., 2008                          |
| 1308                          | 44.287225<br>12.326817 | 240-S8 Milano Marittima<br>Core S8 drilled NW of the town of Milano Marittima. Ground surface at +1.0 m asl.         | SLI               | BRI           | -117±1        | -117±10       | ESR (K-4384)                                     | 129±18          | 3,5                | Ferranti et al., 2006<br>Amorosi et al., 2004<br>Campo et al., 2020 |
|                               |                        |                                                                                                                      |                   |               |               |               | STRAT (Tyrrhenian Adriatic (Eemian pollen unit)) | MIS 5e          |                    |                                                                     |
| 1328                          | 44.306436<br>12.044187 | 240-S2 Villafranca<br>Core S2 of geological map sheet 204 "Forlì", near Villafranca; ground +13.0 m asl.             | TLI               |               | -70±1         | 0±0           | STRAT (Tyrrhenian Adriatic (Eemian pollen unit)) | MIS 5e          | 0,3                | Amorosi et al., 2004<br>Campo et al., 2020                          |
| 1327                          | 44.385075<br>12.041781 | 240-S13 Russi<br>Core S13 of geological map, sheet 240 "Forlì", near Russi, ground +10.0 m asl.                      | SLI               | LAG           | -112±1        | -111.5±1.8    | STRAT (Tyrrhenian Adriatic (Eemian pollen unit)) | MIS 5e          | 4,4                | Amorosi et al., 2004<br>Campo et al., 2020                          |
| 1325                          | 44.414589<br>12.12844  | 223-S12 Ravenna<br>Core S12 of geological map, sheet 223 "Ravenna", west of Ravenna, ground +1.8 m asl.              | SLI               | BRK           | -100±1        | -100±10       | STRAT (Tyrrhenian Adriatic (Eemian pollen unit)) | MIS 5e          | 4,3                | Amorosi et al., 2014<br>Campo et al., 2020                          |
| 1326                          | 44.56695<br>12.218758  | 223-S17 Mandriole<br>Core S17 of geological map, sheet 223 "Ravenna", south of Valli di Comacchio, ground 0.0 m asl. | SLI               | BRK           | -105.5±1      | -105.5±10     | STRAT (Tyrrhenian Adriatic (Eemian pollen unit)) | MIS 5e          | 3,5                | Amorosi et al., 2014<br>Campo et al., 2020                          |
| 1310                          |                        |                                                                                                                      | SLI               | BRK           | -85.5±1       | -85.5±10      | ESR (K-4385)                                     | 154±26          | 3,5                | Ferranti et al., 2006                                               |

| WALIS ID              | Latitude Longitude     | Site                                                                                                                | Type of datapoint | RSL Indicator | Elevation (m) | Paleo RSL (m) | Dating (Original ID)                             | Age (ka or MIS) | Quality (RSL, Age) | Reference(s)                                                        |
|-----------------------|------------------------|---------------------------------------------------------------------------------------------------------------------|-------------------|---------------|---------------|---------------|--------------------------------------------------|-----------------|--------------------|---------------------------------------------------------------------|
|                       | 44.548589<br>11.940942 | 222-S2 Voltana<br>Core S2 of the geological map sheet 222 "Lugo di Romagna", NE of Voltana; ground +5.0 m asl       |                   |               |               |               | STRAT (Tyrrhenian Adriatic (Eemian pollen unit)) | MIS 5e          |                    | Amorosi et al., 2004                                                |
| 1313                  | 44.622539<br>11.813075 | 204-S17 Argenta<br>Core S-17 of the geological map sheet 204 "Portomaggiore" near Argenta; ground surface +7.0 m    | SLI               | BRK           | -54.5±5.3     | -54.5±11.3    | STRAT (Tyrrhenian Adriatic (Eemian pollen unit)) | MIS 5e          | 3,3                | Campo et al., 2020<br>Calabrese et al., 2006                        |
| 1312                  | 44.664156<br>11.785878 | 204-S4 Consandolo<br>Core S4, geological map sheet 204 "Portomaggiore" near Consandolo; ground surface at +1.7 m sl | SLI               | LAG           | -50.8±1.8     | -49.8±2.1     | STRAT (Tyrrhenian Adriatic (Eemian pollen unit)) | MIS 5e          | 4,4                | Campo et al., 2020<br>Calabrese et al., 2006                        |
| 1315                  | 44.720783<br>11.680283 | 204-S15 Marrara<br>Core S-15 of the geological map, sheet 204 "Portomaggiore" near Marrara; ground surface +5.3 m   | TLI               |               | -48.1±1       | 0±0           | STRAT (Tyrrhenian Adriatic (Eemian pollen unit)) | MIS 5e          | 0,3                | Campo et al., 2020<br>Calabrese et al., 2006                        |
| 1314                  | 44.699889<br>11.918761 | Core 204-S16<br>Core S-16 of the geological map, sheet 204 "Portomaggiore" near Ostellato; ground surface +7.0 m    | SLI               | BRK           | -77±2.6       | -77±10.3      | STRAT (Tyrrhenian Adriatic (Eemian pollen unit)) | MIS 5e          | 3,3                | Campo et al., 2020<br>Calabrese et al., 2006                        |
| 1309                  | 44.662453<br>12.18375  | 205-S10 Comacchio<br>Core S10 of the geological map sheet 205 "Comacchio", south of Comacchio; ground at -0.8 m asl | SLI               | BRK           | -112.5±1      | -112.5±10     | ESR (K-4383)                                     | 124±20          | 3,5                | Ferranti et al., 2006<br>Amorosi et al., 2004<br>Campo et al., 2020 |
|                       |                        |                                                                                                                     |                   |               |               |               | STRAT (Tyrrhenian Adriatic (Eemian pollen unit)) | MIS 5e          |                    |                                                                     |
| 1307                  | 44.841086<br>12.191919 | Core F187_S1<br>Valle Giralda, Foglio CARG 187 Codigoro, near Abazia of Pomposa; ground at -2.3 m asl.              | MLI               |               | -102±1        |               | STRAT (Subsintema di Villa Verucchio (AES7))     | MIS 6           | 0,2                | Cibin and Stefani, 2009<br>Campo et al., 2020                       |
| <b>Italy (Veneto)</b> |                        |                                                                                                                     |                   |               |               |               |                                                  |                 |                    |                                                                     |



| WALIS ID | Latitude Longitude     | Site                                                                                                         | Type of datapoint | RSL Indicator | Elevation (m) | Paleo RSL (m) | Dating (Original ID)                             | Age (ka or MIS) | Quality (RSL, Age) | Reference(s)                                                           |
|----------|------------------------|--------------------------------------------------------------------------------------------------------------|-------------------|---------------|---------------|---------------|--------------------------------------------------|-----------------|--------------------|------------------------------------------------------------------------|
| 1306     | 45.29235<br>11.9007    | Ca' Borille<br>Core Ca' Borille, near the town of Bovolenta; ground surface at +4.2 m asl.                   | TLI               |               | -44.5±1       |               | STRAT (Tyrrhenian Adriatic (Eemian pollen unit)) | MIS 5e          | 0,3                | Cucato et al., 2012                                                    |
| 1304     | 45.352278<br>12.1375   | Valle Averno<br>Core CARG 11 in Valle Averno, at the boundary of Venice Lagoon                               | SLI               | LAG           | -61.3±1.3     | -60.3±1.6     | STRAT (Tyrrhenian Adriatic (Eemian pollen unit)) | MIS 5e          | 4,3                | Tosi et al., 2007b<br>Antonioli et al., 2009<br>Fontana et al., 2010   |
| 1305     | 45.336544<br>12.326236 | Malamocco<br>Core at the mouth of Malamocco Inlet in the Venice Lagoon                                       | MLI               |               | -86±1         |               | STRAT (Tyrrhenian Adriatic (Eemian pollen unit)) | MIS 5e          | 0,2                | Antonioli et al., 2009<br>Fontana et al., 2010                         |
| 1303     | 45.438569<br>12.309925 | VE-1<br>Core Venezia1; Venice, Island of Tronchetto                                                          | MLI               |               | -60±1         | -60±0         | STRAT (Tyrrhenian Adriatic (Eemian pollen unit)) | MIS 5e          | 0,3                | Massari et al., 2004<br>Antonioli et al., 2009                         |
| 1302     | 45.555101<br>12.456551 | Portegrandi<br>Core CARG12 near the village of Portegrandi, near Venice Lagoon; ground at 0.0 m asl.         | MLI               |               | -55±1         |               | STRAT (Tyrrhenian Adriatic (Eemian pollen unit)) | MIS 5e          | 0,3                | Tosi et al., 2007a<br>Antonioli et al., 2009<br>Fontana et al., 2010   |
| 1295     | 45.621667<br>12.756111 | TdM Torre di Mosto<br>Core TdM, drilled in Senzielli of Torre di Mosto; ground surface at -1.4 m asl.        | MLI               |               | -             | 56.6±13.7     | STRAT (Tyrrhenian Adriatic (Eemian pollen unit)) | MIS 5e          | 0,4                | Fontana et al., 2012<br>Antonioli et al., 2009<br>Fontana et al., 2010 |
| 793      | 45.774444<br>12.713333 | PRA Belfiore<br>Core PRA, drilled in the village of Belfiore near Pramaggiore; ground surface at +4.0 m asl. | SLI               | LAG           | -54.6±10      | -54.1±10      | STRAT (Tyrrhenian Adriatic (Eemian pollen unit)) | MIS 5e          | 4,4                | Fontana et al., 2012<br>Fontana et al., 2010                           |
| 1289     | 45.795333<br>12.840977 | CNC4 Concordia Sagittaria<br>Core drilled near the theatre of Roman age. Ground surface at +2.0 m asl.       | SLI               | LAG           | -37±1         | -36.5±1.1     | STRAT (Tyrrhenian Adriatic (Eemian pollen unit)) | MIS 5e          | 4,4                | Fontana et al., 2012<br>Antonioli et al., 2009<br>Fontana et al., 2010 |
| 1294     | 45.713992<br>12.94864  | LUG Lugugnana<br>Core LUG, drilled near the village of Marina di Lugugnana; ground at +1.0 m asl.            | MLI               |               | -41±4.6       |               | STRAT (Tyrrhenian Adriatic (Eemian pollen unit)) | MIS 5e          | 0,3                | Fontana et al., 2012<br>Fontana et al., 2010                           |
| 1293     | 45.63955<br>12.954483  | VV Valle Vecchia<br>Core VV in the farm Valle Vecchia, claimed                                               | MLI               |               | -47±2.6       |               | STRAT (Tyrrhenian Adriatic (Eemian pollen unit)) | MIS 5e          | 0,3                | Fontana et al., 2012<br>Fontana et al., 2010                           |

| WALIS ID                             | Latitude Longitude     | Site                                                                                                          | Type of datapoint | RSL Indicator | Elevation (m) | Paleo RSL (m) | Dating (Original ID)                             | Age (ka or MIS) | Quality (RSL, Age) | Reference(s)                                                                      |
|--------------------------------------|------------------------|---------------------------------------------------------------------------------------------------------------|-------------------|---------------|---------------|---------------|--------------------------------------------------|-----------------|--------------------|-----------------------------------------------------------------------------------|
|                                      |                        | in 20th century. Ground 0.0 m asl                                                                             |                   |               |               |               |                                                  |                 |                    |                                                                                   |
| <b>Italy (Friuli-Venezia-Giulia)</b> |                        |                                                                                                               |                   |               |               |               |                                                  |                 |                    |                                                                                   |
| 1301                                 | 45.836747<br>12.670481 | AZX Azzano Core AZX, Casa De Vito near Panigai of Azzano Decimo; ground +9,8 m asl.                           | TLI               |               | -43.9±1.7     |               | STRAT (Tyrrhenian Adriatic (Eemian pollen unit)) | MIS 5e          | 3,5                | Pini et al. 2009<br>Fontana et al., 2010<br>Zanferrari et al. 2008                |
| 1291                                 | 45.78375<br>13.08425   | Piancada Piancada town. Probably elevation of the surface +2 m asl.                                           | SLI               | LAG           | -48±9.2       | -47±9.3       | STRAT (Tyrrhenian Adriatic (Eemian pollen unit)) | MIS 5e          | 3,3                | Feruglio 1936<br>Antonioli et al., 2009<br>Fontana et al., 2010<br>Lipparini 1936 |
| 1292                                 | 45.765014<br>13.102561 | PNC1 Piancada Core PNC1 in Marianis of Piancada, municipality of Palazzolo dello Stella; ground at +1.4 m asl | SLI               | LAG           | -42.1±6.8     | -41.1±6.9     | STRAT (Tyrrhenian Adriatic (Eemian pollen unit)) | MIS 5e          | 4,3                | Antonioli et al., 2009<br>Fontana et al., 2010                                    |
| 1290                                 | 45.74849<br>13.366341  | BLG1, Beligna Core BLG1 (Beligna), in the site of Beligna of Aquileia. Ground surface at +2.0 m asl.          | SLI               | LAG           | -44±8.1       | -43±8.1       | STRAT (Tyrrhenian Adriatic (Eemian pollen unit)) | MIS 5e          | 3,3                | Fontana et al., 2010                                                              |
| <b>France (Corse)</b>                |                        |                                                                                                               |                   |               |               |               |                                                  |                 |                    |                                                                                   |
| 277                                  | 41.3711<br>9.2223      | Piantarella                                                                                                   | MLI               |               | 3.3±0.2       |               | STRAT ( <i>P. latus</i> or Senegalese fauna)     | MIS 5           | 0,3                | Nesteroff, 1984                                                                   |
| 321                                  | 41.47<br>9.075         | Figari                                                                                                        | SLI               | LAG           | 3±0.6         | 4±1.2         | OTHER (Limiting radiocarbon date)                | >MIS 1          | 4,2                | Conchon, 1999<br>Delibrias et al., 1972 Radiocarbon<br>Nesteroff, 1984            |
| 323                                  | 41.47<br>9.01          | Arbitru                                                                                                       | MLI               |               | 2±0.4         |               | OTHER (Limiting radiocarbon date)                | >MIS 1          | 0,2                | Conchon, 1999<br>Delibrias et al., 1972 Radiocarbon<br>Nesteroff, 1984            |
| 303                                  | 41.76<br>8.71          | Ajaccio Gulf Capo Moru                                                                                        | MLI               |               | 2.5±0.5       |               | OTHER (Limiting radiocarbon date)                | >MIS 1          | 0,2                | Conchon, 1999<br>Nesteroff, 1984                                                  |
| 299                                  | 42.6716<br>9.2997      | St Florent                                                                                                    | MLI               |               | 1.5±0.3       |               | AAR (St. Florent, )                              | MIS 5e          | 0,3                | Conchon, 1999<br>Hearty, 1987a<br>Ottman, 1954                                    |
| 931                                  | 42.96<br>9.45          | Macinaggio Tamarone                                                                                           | SLI               | LIT           | 6±0.5         | 6.3±0.6       | STRAT ( <i>P. latus</i> or Senegalese fauna)     | MIS 5           | 5,3                | Ottman, 1954                                                                      |
| 322                                  | 42.06<br>9.46          | Urbino                                                                                                        | MLI               |               | 1±0.2         |               | OTHER (Limiting radiocarbon date)                | >MIS 1          | 0,2                | Conchon, 1999<br>Delibrias et al., 1972 Radiocarbon<br>Nesteroff, 1984            |
| <b>Italy (Sardinia)</b>              |                        |                                                                                                               |                   |               |               |               |                                                  |                 |                    |                                                                                   |
| 432                                  | 40.02<br>9.7           | Pedralonga                                                                                                    | SLI               | NTC           | 7.4±0.2       | 7.4±0.4       | STRAT ( <i>P. latus</i> or Senegalese fauna)     | MIS 5           | 5,2                | Antonioli et al., 2018                                                            |

| WALIS ID | Latitude Longitude | Site                                | Type of datapoint | RSL Indicator | Elevation (m) | Paleo RSL (m) | Dating (Original ID)                         | Age (ka or MIS) | Quality (RSL, Age) | Reference(s)                                             |
|----------|--------------------|-------------------------------------|-------------------|---------------|---------------|---------------|----------------------------------------------|-----------------|--------------------|----------------------------------------------------------|
| 435      | 40.09<br>9.72      | Capo Monte Santu                    | SLI               | NTC           | 7.9±0.1       | 7.9±0.3       | STRAT ( <i>P. latus</i> or Senegalese fauna) | MIS 5           | 5,2                | Antonioli et al., 2018                                   |
| 434      | 40.24<br>9.62      | Orosei Nord                         | SLI               | NTC           | 9.5±0.2       | 9.5±0.4       | STRAT ( <i>P. latus</i> or Senegalese fauna) | MIS 5           | 5,2                | Antonioli et al., 2018                                   |
| 292      | 40.8878<br>9.6928  | Tavolara<br>Punta la mandria        | MLI               |               | 1.8±0.3       |               | AAR (TV1)                                    | 120±36          | 0,3                | Belluomini et al., 1986<br>Belluomini and Delitala, 1988 |
| 431      | 40.91<br>9.74      | Tavolara                            | SLI               | NTC           | 6.7±0.4       | 6.7±0.5       | STRAT ( <i>P. latus</i> or Senegalese fauna) | MIS 5           | 5,2                | Antonioli et al., 2018                                   |
| 430      | 40.99<br>9.66      | Capo Figari                         | SLI               | NTC           | 4.7±0.2       | 4.7±0.4       | STRAT ( <i>P. latus</i> or Senegalese fauna) | MIS 5           | 5,2                | Antonioli et al., 2018                                   |
| 289      | 41.2368<br>9.1656  | Capo Testa_santa<br>Reparata<br>TLI | TLI               |               | 0.3±0.5       |               | AAR (Sequence 3)                             | 90±27           | 0,3                | Kindler et al. 1997                                      |
| 290      | 41.2365<br>9.1649  | Capo Testa_santa<br>Reparata<br>MLI | MLI               |               | 3±0.5         |               | AAR (Sequence 3)                             | 90±27           | 0,3                | Kindler et al. 1997                                      |
| 300      | 40.9295<br>8.8052  | Badesi Mare<br>San Pietro a Mare    | MLI               |               | 1.5±0.3       |               | AAR (SPM1)                                   | MIS 5e          | 0,3                | Belluomini and Delitala, 1988<br>Belluomini et al., 1986 |
|          |                    |                                     |                   |               |               |               | AAR (SPM2)                                   | MIS 5e          |                    |                                                          |
| 388      | 40.63<br>8.18      | Cala Viola                          | SLI               | BRK           | 3.5±0.2       | 3.4±0.3       | LUM (CVL3)                                   | 136±8           | 5,3                | Casini et al., 2020                                      |
| 382      | 40.6<br>8.14       | Capo Caccia 1                       | SLI               | NTC           | 3.8±0.1       | 3.8±0.3       | STRAT ( <i>P. latus</i> or Senegalese fauna) | MIS 5           | 5,2                | Antonioli et al., 2018                                   |
| 383      | 40.56<br>8.16      | Capo Caccia 2                       | SLI               | NTC           | 3.5±0.1       | 3.5±0.3       | STRAT ( <i>P. latus</i> or Senegalese fauna) | MIS 5           | 5,2                | Antonioli et al., 2018                                   |
| 234      | 40.5503<br>8.3203  | El trò                              | SLI               | ARI           | 3.5±0.1       | 3.3±0.3       | LUM (CV2_feldspar)                           | 127±14          | 5,4                | Sechi et al., 2020                                       |
| 235      | 40.5179<br>8.3328  | Punta Padre Bellu                   | SLI               | ARI           | 3.3±0.1       | 3.1±0.3       | LUM (PPB1_feldspar)                          | 135±8           | 5,4                | Sechi et al., 2020                                       |
| 236      | 40.5089<br>8.3391  | Baurantinu                          | SLI               | ARI           | 3.5±0.1       | 3.3±0.3       | LUM (BUR_feldspar)                           | 119±6           | 5,5                | Sechi et al., 2020                                       |
| 241      | 40.3121<br>8.4636  | Bosa<br>Sect 1                      | MLI               |               | 1.5±0.1       |               | LUM (SD2_quartz)                             | 93±7            | 0,5                | Sechi et al., 2020                                       |
|          |                    |                                     |                   |               |               |               | LUM (SD2_feldspar)                           | 99±6            |                    |                                                          |
| 243      | 40.3121<br>8.4636  | Bosa<br>Sect 2                      | MLI               |               | 2±0.1         |               | LUM (PA2_feldspar)                           | 139±13          | 0,4                | Sechi et al., 2020                                       |
| 244      | 40.2428<br>8.4722  | Bosa<br>Sect 3                      | SLI               | ARI           | 3±0.1         | 2.8±0.3       | LUM (SD1)                                    | 125±8           | 5,4                | Sechi et al., 2020                                       |
| 238      | 40.2428<br>8.4722  | Porto Alabe                         | SLI               | ARI           | 3.3±0.1       | 3.1±0.3       | LUM (PA3_feldspar)                           | 134±13          | 5,4                | Sechi et al., 2020                                       |
| 262      | 39.8859<br>8.4333  | San Giovanni del Sinis<br>1         | SLI               | BRK           | 1.8±0.3       | 2.8±2         | U-series (CLD1)                              | 151±7.8         | 3,2                | Carboni et al., 2014                                     |
| 271      | 39.8861<br>8.4332  | San Giovanni del Sinis<br>4         | SLI               | BRK           | 5.2±0.2       | 5.7±1.5       | LUM (SGS2)                                   | 120±10          | 5,5                | Andreucci et al., 2009                                   |
| 272      | 39.8829<br>8.4357  | San Giovanni del Sinis<br>5         | MLI               |               | 2.5±0.2       |               | LUM (SGS3)                                   | 100±5           | 0,5                | Andreucci et al., 2009                                   |

| WALIS ID              | Latitude Longitude | Site                                            | Type of datapoint | RSL Indicator | Elevation (m) | Paleo RSL (m) | Dating (Original ID)                         | Age (ka or MIS) | Quality (RSL, Age) | Reference(s)                                                           |
|-----------------------|--------------------|-------------------------------------------------|-------------------|---------------|---------------|---------------|----------------------------------------------|-----------------|--------------------|------------------------------------------------------------------------|
| 265                   | 39.8807<br>8.4364  | San Giovanni del Sinis 3                        | SLI               | BRK           | 0.8±0.3       | 1.8±2         | U-series (CLD3)                              | 139±4.1         | 4,2                | Carboni et al., 2014                                                   |
| 266                   | 39.858<br>8.4355   | Faro Capo San Marco                             | SLI               | BRK           | 3±0.5         | 4±2.1         | U-series (CLD5)                              | 135±4.1         | 3,2                | Carboni et al., 2014                                                   |
| 261                   | 39.8637<br>8.4391  | Capo San Marco                                  | MLI               |               | 2.5±0.3       |               | U-series (Capo San Marco)                    | 70±4            | 0,4                | D'Orefice et al., 2012                                                 |
| 263                   | 39.8688<br>8.4398  | San Giovanni del Sinis 2                        | SLI               | BRK           | 1±0.3         | 2±2           | U-series (CLD2)                              | 128±4.1         | 4,3                | Carboni et al., 2014                                                   |
| 437                   | 39.39<br>8.38      | Buggerru                                        | SLI               | NTC           | 3.5±0.1       | 3.5±0.3       | STRAT ( <i>P. latus</i> or Senegalese fauna) | MIS 5           | 5,2                | Antonioli et al., 2018                                                 |
| 436                   | 39.33<br>8.4       | Masua                                           | SLI               | NTC           | 3.2±0.1       | 3.2±0.3       | STRAT ( <i>P. latus</i> or Senegalese fauna) | MIS 5           | 5,2                | Antonioli et al., 2018                                                 |
| 296                   | 39.0063<br>8.3847  | Sant'Antioco<br>Cala Sapone                     | SLI               | BRK           | 7.5±0.3       | 8±2.5         | STRAT ( <i>P. latus</i> or Senegalese fauna) | MIS 5           | 3,3                | Orrù et al., 2011                                                      |
| 433                   | 38.98<br>8.44      | Sant'Antioco                                    | SLI               | NTC           | 2.8±0.2       | 2.8±0.5       | AAR (S10)                                    | MIS 5e          | 4,2                | Antonioli et al., 2018<br>Ulzega and Hearty, 1986                      |
|                       |                    |                                                 |                   |               |               |               | STRAT ( <i>P. latus</i> or Senegalese fauna) | MIS 5           |                    |                                                                        |
| 295                   | 38.8918<br>8.8007  | Capo Malfatano                                  | SLI               | BRK           | 2±0.3         | 2.5±2.5       | STRAT ( <i>P. latus</i> or Senegalese fauna) | MIS 5           | 3,3                | Orrù et al., 2014                                                      |
| 1336                  | 38.985<br>8.99     | Nora                                            | MLI               |               | 1.5±0.5       |               | AAR (S7)                                     | 125±37.5        | 0,3                | Kindler et al. 1997<br>Ulzega and Hearty, 1986                         |
| 1337                  | 38.986<br>9        | Nora<br>Is Fradis                               | SLI               | BRK           | 1.8±0.5       | 3.3±0.7       | AAR (S7)                                     | 125±37.5        | 4,3                | Kindler et al. 1997<br>Ulzega and Hearty, 1986                         |
| 279                   | 38.9867<br>9.006   | Nora-Is Fradis                                  | MLI               |               | 1±0.2         |               | STRAT ( <i>P. latus</i> or Senegalese fauna) | MIS 5           | 0,3                | Ulzega and Hearty, 1986                                                |
| 278                   | 39.2182<br>9.0442  | Sa Illetta                                      | MLI               |               | 1.5±0.2       |               | U-series (S6)                                | 149±10          | 0,2                | Ulzega and Hearty, 1986                                                |
| 1338                  | 39.187<br>9.141    | Cagliari<br>Marina Piccola                      | SLI               | BRK           | 2.5±0.5       | 3±1           | AAR (MP2)                                    | 125±37.5        | 4,3                | Stocchi et al, 2018<br>Hearty et al., 1986a<br>Ulzega and Hearty, 1986 |
| 132                   | 39.184<br>9.149    | Cagliari<br>Cala Mosca                          | SLI               | BRK           | 2.8±0.5       | 3.3±1         | U-series (S-C-4)                             | 138±7           | 4,4                | Stocchi et al, 2018<br>Hearty et al., 1986a<br>Ulzega and Hearty, 1986 |
| 276                   | 39.2217<br>9.1663  | Is Arenas                                       | SLI               | BRK           | 3±0.2         | 3.5±1.5       | ESR (K-5741)                                 | 103±8.6         | 4,3                | Orrù et al., 2011<br>Orrù et al., 2009                                 |
|                       |                    |                                                 |                   |               |               |               | ESR (K-5742)                                 | 154.3±9.2       |                    |                                                                        |
|                       |                    |                                                 |                   |               |               |               | ESR (K-5744)                                 | 81.2±8.1        |                    |                                                                        |
|                       |                    |                                                 |                   |               |               |               | ESR (K-5745)                                 | 112.6±7.5       |                    |                                                                        |
| 293                   | 39.1215<br>9.5096  | Capo Carbonara<br>Villasimius                   | SLI               | BRK           | 5.1±0.2       | 5.6±2.5       | STRAT ( <i>P. latus</i> or Senegalese fauna) | MIS 5           | 3,3                | Orrù et al., 1994                                                      |
| 294                   | 39.0866<br>9.5345  | Capo Carbonara<br>Isola dei cavoli-Cala Ponente | SLI               | BRK           | 2.7±0.2       | 3.2±2.5       | STRAT ( <i>P. latus</i> or Senegalese fauna) | MIS 5           | 3,3                | Orrù et al., 1994                                                      |
| <b>Italy (Sicily)</b> |                    |                                                 |                   |               |               |               |                                              |                 |                    |                                                                        |

| WALIS ID | Latitude Longitude     | Site                                                | Type of datapoint | RSL Indicator | Elevation (m) | Paleo RSL (m) | Dating (Original ID)                         | Age (ka or MIS) | Quality (RSL, Age) | Reference(s)                                                                 |
|----------|------------------------|-----------------------------------------------------|-------------------|---------------|---------------|---------------|----------------------------------------------|-----------------|--------------------|------------------------------------------------------------------------------|
| 899      | 37.72579<br>12.4778    | Marsala-Mazzaro del Vallo<br>Torre Scibiliana       | SLI               | MT            | 34±6.8        | 34±6.9        | STRAT ( <i>P. latus</i> or Senegalese fauna) | MIS 5           | 2,3                | Ruggieri et al., 1976<br>D'Angelo & Vernuccio, 1996<br>Ruggieri & Unti, 1988 |
| 919      | 37.890707<br>12.473816 | Trapani Birgi                                       | SLI               | BRK           | 2±0.4         | 2.3±0.9       | STRAT ( <i>P. latus</i> or Senegalese fauna) | MIS 5           | 4,3                | Ruggieri and Unti. 1974                                                      |
| 855      | 37.930049<br>12.350824 | Favignana<br>Egadi archipelago                      | SLI               | NTC           | 12.5±0.5      | 12.5±0.5      | STRAT ( <i>P. latus</i> or Senegalese fauna) | MIS 5           | 5,2                | Malatesta et al., 1957<br>Abate et al., 1992                                 |
| 841      | 37.946651<br>12.087998 | Facciazzo<br>Marettimo Island                       | SLI               | MT            | 6±1.5         | 6±2           | LUM (Cala Rossa)                             | 111±20          | 4,3                | Antonioli et al., 2002<br>Mauz et al., 1997                                  |
| 836      | 37.950461<br>12.082601 | Cala Marino<br>Marettimo Island                     | SLI               | NTC           | 7.1±0.5       | 7.1±0.5       | LUM (Cala Rossa)                             | 111±20          | 5,2                | Antonioli et al., 2002<br>Mauz et al., 1997                                  |
| 840      | 37.952251<br>12.081834 | Cala Marino (II)<br>Marettimo Island                | SLI               | MT            | 5±1.5         | 5±2           | LUM (Cala Rossa)                             | 111±20          | 4,3                | Antonioli et al., 2002<br>Mauz et al., 1997                                  |
| 842      | 37.950223<br>12.077871 | Cala Conca<br>Marettimo Island                      | SLI               | MT            | 4±1.5         | 4±2           | LUM (Cala Rossa)                             | 111±20          | 4,3                | Antonioli et al., 2002<br>Mauz et al., 1997                                  |
| 843      | 37.958734<br>12.044408 | Cala Nera<br>Marettimo Island                       | SLI               | MT            | 11±1.5        | 11±2          | LUM (Cala Rossa)                             | 111±20          | 4,3                | Antonioli et al., 2002<br>Mauz et al., 1997                                  |
| 837      | 37.972247<br>12.040814 | P. Pegna<br>Marettimo Island                        | SLI               | NTC           | 7.6±0.5       | 7.6±0.5       | LUM (Cala Rossa)                             | 111±20          | 5,2                | Antonioli et al., 2002<br>Mauz et al., 1997                                  |
| 833      | 37.992445<br>12.041292 | P.ta Due Frati<br>Marettimo Island                  | SLI               | NTC           | 8.2±0.5       | 8.2±0.5       | LUM (Cala Rossa)                             | 111±20          | 5,2                | Antonioli et al., 2002<br>Malatesta et al., 1957<br>Mauz et al., 1997        |
| 834      | 37.990279<br>12.059884 | Scalo Maestro<br>Marettimo Island                   | SLI               | NTC           | 7.5±0.5       | 7.5±0.5       | LUM (Cala Rossa)                             | 111±20          | 5,2                | Antonioli et al., 2002<br>Mauz et al., 1997                                  |
| 838      | 37.991736<br>12.061893 | Tuono<br>Marettimo Island                           | SLI               | MT            | 10.4±1.5      | 10.4±2        | LUM (Cala Rossa)                             | 111±20          | 4,3                | Antonioli et al., 2002<br>Mauz et al., 1997                                  |
| 835      | 37.983453<br>12.065391 | Sco. Camello<br>Marettimo Island                    | SLI               | NTC           | 5±0.5         | 5±0.5         | LUM (Cala Rossa)                             | 111±20          | 5,2                | Antonioli et al., 2002<br>Mauz et al., 1997                                  |
| 839      | 37.972651<br>12.068992 | Passo del Bue<br>Marettimo Island                   | SLI               | MT            | 5±1.5         | 5±2           | LUM (Cala Rossa)                             | 111±20          | 4,3                | Antonioli et al., 2002<br>Mauz et al., 1997                                  |
| 854      | 37.98835<br>12.328824  | Pietre Varate<br>Levanzo Island (Egadi archipelago) | SLI               | NTC           | 5±0.5         | 5±0.5         | STRAT ( <i>P. latus</i> or Senegalese fauna) | MIS 5           | 5,2                | Malatesta et al., 1957<br>Ferranti et al., 2006                              |
| 852      | 37.987276<br>12.340913 | Cala Dogana<br>Levanzo Island (Egadi archipelago)   | SLI               | MT            | 5±1           | 4.9±1.6       | STRAT ( <i>P. latus</i> or Senegalese fauna) | MIS 5           | 4,3                | Malatesta et al., 1957<br>Ferranti et al., 2006                              |
| 853      | 37.989734<br>12.345714 | Cala Fredda<br>Levanzo Island (Egadi archipelago)   | SLI               | MT            | 5±1           | 4.9±1.6       | STRAT ( <i>P. latus</i> or Senegalese fauna) | MIS 5           | 4,3                | Malatesta et al., 1957<br>Ferranti et al., 2006                              |
| 920      | 38.033343<br>12.526471 | Trapani- Tonnara S.<br>Giuliano                     | SLI               | BRK           | 5±1           | 5.3±1.3       | STRAT ( <i>P. latus</i> or Senegalese fauna) | MIS 5           | 3,3                | Ruggieri and Unti. 1974                                                      |
| 894      | 38.101255<br>12.658343 | Monte Cofano<br>Trapani                             | SLI               | MT            | 20±2          | 19.9±2.3      | STRAT ( <i>P. latus</i> or Senegalese fauna) | MIS 5           | 4,3                | Antonioli et al., 2006c                                                      |
| 845      | 38.111868<br>12.723722 | Castelluzzo<br>San Vito lo Capo                     | SLI               | MT            | 14±1.5        | 14±2          | LUM (Cala Rossa)                             | 111±20          | 4,4                | Antonioli et al., 2002<br>Mauz et al., 1997                                  |
|          |                        |                                                     |                   |               |               |               | STRAT ( <i>P. latus</i> or Senegalese fauna) | MIS 5           |                    |                                                                              |

| WALIS ID | Latitude Longitude     | Site                             | Type of datapoint | RSL Indicator | Elevation (m) | Paleo RSL (m) | Dating (Original ID)                         | Age (ka or MIS) | Quality (RSL, Age) | Reference(s)                                                                                    |
|----------|------------------------|----------------------------------|-------------------|---------------|---------------|---------------|----------------------------------------------|-----------------|--------------------|-------------------------------------------------------------------------------------------------|
| 830      | 38.138155<br>12.73782  | Macari                           | SLI               | MT            | 5±1           | 4.9±1.6       | STRAT ( <i>P. latus</i> or Senegalese fauna) | MIS 5           | 4,2                | Mauz et al., 1997                                                                               |
| 844      | 38.17592<br>12.716799  | Cala Mancino<br>San Vito lo Capo | SLI               | NTC           | 7.1±0.5       | 7.1±0.5       | LUM (Cala Rossa)                             | 111±20          | 5,2                | Antonioli et al., 2002<br>Mauz et al., 1997                                                     |
|          |                        |                                  |                   |               |               |               | STRAT ( <i>P. latus</i> or Senegalese fauna) | MIS 5           |                    |                                                                                                 |
| 923      | 38.181488<br>12.719884 | San Vito lo Capo<br>W side       | SLI               | MT            | 12.5±1.5      | 12.4±1.9      | U-series (ENEA1013)                          | >19.7±5.3       | 3,4                | Abate et al., 1991<br>Antonioli et al., 2002                                                    |
|          |                        |                                  |                   |               |               |               | STRAT ( <i>P. latus</i> or Senegalese fauna) | MIS 5           |                    |                                                                                                 |
| 922      | 38.185555<br>12.733778 | San Vito lo Capo<br>NE side      | SLI               | NTC           | 8±0.5         | 8±0.5         | U-series (ENEA1013)                          | >19.7±5.3       | 5,2                | Abate et al., 1991<br>Antonioli et al., 2002                                                    |
|          |                        |                                  |                   |               |               |               | STRAT ( <i>P. latus</i> or Senegalese fauna) | MIS 5           |                    |                                                                                                 |
| 828      | 38.056002<br>12.846727 | Cala Rossa                       | SLI               | MT            | 5±1           | 4.9±1.6       | LUM (Cala Rossa)                             | 111±20          | 4,4                | Mauz et al., 1997                                                                               |
|          |                        |                                  |                   |               |               |               | STRAT ( <i>P. latus</i> or Senegalese fauna) | MIS 5           |                    |                                                                                                 |
| 829      | 38.054641<br>12.850376 | Cala Bianca                      | SLI               | MT            | 5±1           | 4.9±1.6       | LUM (Cala Bianca)                            | 140±24          | 4,4                | Mauz et al., 1997                                                                               |
|          |                        |                                  |                   |               |               |               | STRAT ( <i>P. latus</i> or Senegalese fauna) | MIS 5           |                    |                                                                                                 |
| 827      | 38.087801<br>13.078016 | Torre San Cataldo                | SLI               | MT            | 18±3.6        | 17.9±3.8      | LUM (San Cataldo)                            | 131±43          | 2,4                | Mauz et al., 1997                                                                               |
|          |                        |                                  |                   |               |               |               | STRAT ( <i>P. latus</i> or Senegalese fauna) | MIS 5           |                    |                                                                                                 |
| 826      | 38.08832<br>13.078468  | Nocella                          | SLI               | MT            | 18±3.6        | 17.9±3.8      | LUM (Nocella)                                | 101±43          | 2,3                | Mauz et al., 1997                                                                               |
| 916      | 38.705192<br>13.172467 | Ustica                           | SLI               | BRK           | 30±6          | 30.3±6.1      | U-series (UST1002b)                          | 132±5           | 2,5                | Hearty, 1986b<br>Antonioli et al., 2006c<br>Ruggieri and Buccheri, 1968<br>de Vita et al., 1998 |
|          |                        |                                  |                   |               |               |               | AAR (N/A)                                    | >121±36.3       |                    |                                                                                                 |
|          |                        |                                  |                   |               |               |               | STRAT ( <i>P. latus</i> or Senegalese fauna) | MIS 5           |                    |                                                                                                 |
| 897      | 38.223639<br>13.316765 | Palermo<br>Capo Gallo            | SLI               | BRK           | 2±0.4         | 2.2±0.9       | STRAT ( <i>P. latus</i> or Senegalese fauna) | MIS 5           | 5,3                | Gignoux, 1913<br>Antonioli et al., 2006c                                                        |
| 832      | 38.21937<br>13.315839  | Capo Gallo                       | SLI               | BRK           | 2±0.4         | 2.2±0.9       | STRAT ( <i>P. latus</i> or Senegalese fauna) | MIS 5           | 4,2                | Gignoux, 1913<br>Benjamin et al., 2017<br>Taviani, 2014<br>Zazo et al., 2013                    |
| 896      | 38.147436<br>13.368541 | Palermo                          | SLI               | BRK           | 10±2          | 10.2±2.1      | STRAT ( <i>P. latus</i> or Senegalese fauna) | MIS 5           | 4,3                | Fabiani, 1941                                                                                   |
| 831      | 38.111247<br>13.533749 | Capo Zafferano                   | SLI               | NTC           | 7±0.5         | 7±0.5         | U-series (N/A)                               | MIS5e           | 5,2                | Mauz et al., 1997<br>Antonioli et al., 1994c<br>Antonioli et al., 1994a                         |
| 863      | 38.035052<br>14.039278 | Cefalù (II)<br>La Kalura         | SLI               | NTC           | 30±0.5        | 30±0.5        | AAR (Cefalù 1)                               | >MIS 5          | 5,2                | Antonioli et al., 2006c                                                                         |
|          |                        |                                  |                   |               |               |               | AAR (Cefalù 2)                               | >MIS 5          |                    |                                                                                                 |
| 862      |                        | Cefalù                           | SLI               | NTC           | 29±0.5        | 29±0.5        | AAR (Cefalù 1)                               | >MIS 5          | 5,2                | Antonioli et al., 2006c                                                                         |

| WALIS ID | Latitude Longitude     | Site             | Type of datapoint | RSL Indicator | Elevation (m) | Paleo RSL (m) | Dating (Original ID)                          | Age (ka or MIS) | Quality (RSL, Age) | Reference(s)                                                                                                                          |
|----------|------------------------|------------------|-------------------|---------------|---------------|---------------|-----------------------------------------------|-----------------|--------------------|---------------------------------------------------------------------------------------------------------------------------------------|
|          | 38.040034<br>14.02887  |                  |                   |               |               |               | AAR (Cefalù 2)                                | >MIS 5          |                    |                                                                                                                                       |
| 849      | 37.500082<br>15.067219 | Catania          | SLI               | MT            | 165±16.5      | 164.9±16.5    | OTHER (Clast of Ancient Alkalic Centres Unit) | <MIS 7          | 2,2                | Monaco et al., 2002<br>Ferranti et al., 2006<br>Gillot et al., 1994                                                                   |
| 850      | 37.500082<br>15.067219 | Catania (II)     | SLI               | MT            | 100±10        | 99.9±10       | OTHER (Clast of Ancient Alkalic Centres Unit) | <MIS 7          | 2,2                | Monaco et al., 2002<br>Ferranti et al., 2006<br>Gillot et al., 1994                                                                   |
| 851      | 37.500082<br>15.067219 | Catania (III)    | SLI               | MT            | 100±10        | 99.9±10       | OTHER (Clast of Ancient Alkalic Centres Unit) | <MIS 7          | 2,2                | Monaco et al., 2002<br>Ferranti et al., 2006<br>Gillot et al., 1994                                                                   |
| 848      | 37.562777<br>15.155716 | Aci Trezza (III) | SLI               | MT            | 100±10        | 99.9±10       | OTHER (Clast of Ancient Alkalic Centres Unit) | <MIS 7          | 2,3                | Monaco et al., 2002<br>Ferranti et al., 2006<br>Gillot et al., 1994                                                                   |
| 847      | 37.562777<br>15.155716 | Aci Trezza (II)  | SLI               | MT            | 125±12.5      | 124.9±12.5    | OTHER (Clast of Ancient Alkalic Centres Unit) | MIS 7           | 2,3                | Monaco et al., 2002<br>Ferranti et al., 2006<br>Gillot et al., 1994                                                                   |
| 846      | 37.562777<br>15.155716 | Aci Trezza       | SLI               | MT            | 175±17.5      | 174.9±17.5    | OTHER (Clast of Ancient Alkalic Centres Unit) | MIS 7           | 2,2                | Monaco et al., 2002<br>Ferranti et al., 2006<br>Gillot et al., 1994                                                                   |
| 3626     | 37.853453<br>15.296823 | Taormina (II)    | SLI               | NTC           | 130±0.5       | 129.9±0.8     | ESR (K4343)                                   | 76.4±7          | 5,2                | Bonfiglio, 1981<br>Antonioli et al., 2006c<br>Catalano and De Guidi, 2003                                                             |
|          |                        |                  |                   |               |               |               | ESR (k4244)                                   | 103.3±12.5      |                    |                                                                                                                                       |
| 903      | 37.853453<br>15.296823 | Taormina         | SLI               | BRK           | 115±11.5      | 114.9±11.5    | ESR (K4343)                                   | 76.4±7          | 2,3                | Antonioli et al., 2006b<br>Bonfiglio, 1981<br>Catalano and De Guidi, 2003<br>Antonioli et al., 2006c                                  |
|          |                        |                  |                   |               |               |               | ESR (k4244)                                   | 103.3±12.5      |                    |                                                                                                                                       |
| 902      | 38.269623<br>15.604196 | Capo Peloro      | SLI               | MT            | 110±11        | 109.9±11      | AAR (20)                                      | MIS 5e          | 2,4                | Bonfiglio & Violanti, 1983<br>Antonioli et al., 2004<br>Hearty et al., 1986a<br>Hearty, 1986b                                         |
|          |                        |                  |                   |               |               |               | STRAT ( <i>P. latus</i> or Senegalese fauna)  | MIS 5           |                    |                                                                                                                                       |
| 921      | 38.255355<br>15.246463 | Milazzo          | SLI               | MT            | 90±9          | 89.9±9        | AAR (21)                                      | >MIS 5c         | 2,3                | Hearty et al., 1986a<br>Hearty, 1986b                                                                                                 |
|          |                        |                  |                   |               |               |               | AAR (21)                                      | >MIS 5c         |                    |                                                                                                                                       |
| 918      | 38.638881<br>15.074178 | Panarea (II)     | SLI               | MT            | 115±11.5      | 115.2±11.5    | AAR (23)                                      | >MIS 5e         | 2,3                | Lucchi et al., 2004<br>Antonioli et al., 2006c<br>Hearty, 1986b                                                                       |
| 917      | 38.638881<br>15.074178 | Panarea          | SLI               | BRK           | 50±10         | 50.2±10       | AAR (23)                                      | >MIS 5e         | 2,3                | Hearty, 1986b<br>Antonioli et al., 2006c                                                                                              |
| 911      | 38.479865<br>14.900262 | Lipari (III)     | SLI               | MT            | 12±1.2        | 11.9±1.5      | U-series (N/A)                                | <119±6          | 4,3                | Lucchi et al., 2001<br>Antonioli et al., 2006c<br>Calanchi et al., 2002<br>Lucchi et al., 2004<br>Lucchi et al., 2004b<br>Radke, 1986 |

| WALIS ID         | Latitude Longitude     | Site                    | Type of datapoint | RSL Indicator | Elevation (m) | Paleo RSL (m) | Dating (Original ID)                          | Age (ka or MIS) | Quality (RSL, Age) | Reference(s)                                                                                                                          |
|------------------|------------------------|-------------------------|-------------------|---------------|---------------|---------------|-----------------------------------------------|-----------------|--------------------|---------------------------------------------------------------------------------------------------------------------------------------|
| 910              | 38.479865<br>14.900262 | Lipari (II)             | SLI               | MT            | 25±2.5        | 24.9±2.7      | U-series (N/A)                                | <119±6          | 2,3                | Lucchi et al., 2001<br>Antonioli et al., 2006c<br>Calanchi et al., 2002<br>Lucchi et al., 2004<br>Lucchi et al., 2004b<br>Radke, 1986 |
| 909              | 38.479865<br>14.900262 | Lipari (I)              | SLI               | MT            | 44±4.4        | 43.9±4.5      | U-series (N/A)                                | 119±6           | 2,3                | Lucchi et al., 2001<br>Antonioli et al., 2006c<br>Calanchi et al., 2002<br>Lucchi et al., 2004<br>Lucchi et al., 2004b<br>Radke, 1986 |
| 914              | 38.578052<br>14.577761 | Filicudi                | SLI               | MT            | 45±4.5        | 45.2±4.6      | ESR (N/A)                                     | MIS 5e          | 2,3                | Lucchi et al., 2004<br>Antonioli et al., 2006c<br>Radke, 1986                                                                         |
| 924              | 38.075925<br>14.65973  | Sant'Agata di Militello | SLI               | MT            | 100±10        | 99.9±10       | LUM (23)                                      | 118±7           | 2,3                | Giunta et al., 2012                                                                                                                   |
| 901              | 37.268912<br>15.224508 | Augusta Mt. Tauro       | SLI               | MT            | 15±3          | 14.9±3.1      | OTHER (Clast of Ancient Alkalic Centres Unit) | <MIS 7          | 3,4                | Di Grande & Scamarda, 1973<br>Antonioli et al., 2006c<br>Cosentino & Gliozzi, 1988<br>Di Grande & Neri, 1988<br>Gillot et al., 1994   |
| 3577             | 37.00389<br>15.312381  | Plemmiro Cave           | TLI               |               | -22.2±0.5     |               | U-series (JD073)                              | 75.3±0.6        | 0,5                | Dutton et al., 2009                                                                                                                   |
|                  |                        |                         |                   |               |               |               | U-series (JD074)                              | 72.4±0.8        |                    |                                                                                                                                       |
|                  |                        |                         |                   |               |               |               | U-series (JD076)                              | 72.7±1.5        |                    |                                                                                                                                       |
|                  |                        |                         |                   |               |               |               | U-series (JD077)                              | 74.2±1.1        |                    |                                                                                                                                       |
|                  |                        |                         |                   |               |               |               | U-series (JD082)                              | 75.2±1.4        |                    |                                                                                                                                       |
|                  |                        |                         |                   |               |               |               | U-series (JD083)                              | 74.7±0.9        |                    |                                                                                                                                       |
|                  |                        |                         |                   |               |               |               | U-series (JD084)                              | 76.5±1.3        |                    |                                                                                                                                       |
| U-series (JD085) | 73.7±0.8               |                         |                   |               |               |               |                                               |                 |                    |                                                                                                                                       |
| 900              | 36.746989<br>15.102658 | Pachino                 | SLI               | BRK           | 15±3          | 15.2±3.1      | STRAT ( <i>P. latus</i> or Senegalese fauna)  | MIS 5           | 3,3                | Malatesta, 1985                                                                                                                       |
| 907              | 35.506086<br>12.605981 | Lampedusa               | SLI               | BRK           | 4±0.8         | 4.4±1.3       | STRAT ( <i>P. latus</i> or Senegalese fauna)  | MIS 5           | 4,3                | Segre, 1960<br>Buccheri et al., 1999                                                                                                  |
| <b>Algeria</b>   |                        |                         |                   |               |               |               |                                               |                 |                    |                                                                                                                                       |
| 4                | 36.63235<br>2.40189    | Chenoua Transect AT1    | SLI               | MT            | 3.5±1         | 3.5±1.5       | STRAT (Tipaza Eemian Terrace)                 | MIS 5           | 3,2                | Authemayou et al., 2017<br>Saoudi, 1989<br>Stearns and Thurber, 1965                                                                  |
| 5                | 36.591389<br>2.450042  | Tipasa Transect AT2     | SLI               | MT            | 8±3           | 8±3.2         | STRAT (Tipaza Eemian Terrace)                 | MIS 5           | 2,2                | Authemayou et al., 2017<br>Saoudi, 1989<br>Stearns and Thurber, 1965                                                                  |



| WALIS ID       | Latitude Longitude     | Site                           | Type of datapoint | RSL Indicator | Elevation (m) | Paleo RSL (m) | Dating (Original ID)                            | Age (ka or MIS) | Quality (RSL, Age) | Reference(s)                                                         |
|----------------|------------------------|--------------------------------|-------------------|---------------|---------------|---------------|-------------------------------------------------|-----------------|--------------------|----------------------------------------------------------------------|
| 6              | 36.617189<br>2.644633  | Bou Haroun<br>Transect AT3     | SLI               | MT            | 7±1           | 7±1.5         | U-series (21)                                   | MIS 5           | 2,2                | Authemayou et al., 2017<br>Saoudi, 1989<br>Stearns and Thurber, 1965 |
|                |                        |                                |                   |               |               |               | STRAT (Tipaza<br>Eemian Terrace)                | MIS 5           |                    |                                                                      |
| 7              | 36.594578<br>2.572592  | Tipasa<br>Transect AT2'        | SLI               | MT            | 6±2           | 6±2.3         | STRAT (Tipaza<br>Eemian Terrace)                | MIS 5           | 2,1                | Authemayou et al., 2017<br>Saoudi, 1989<br>Stearns and Thurber, 1965 |
| 8              | 36.653492<br>2.77926   | Mazafran<br>Transect AT4       | SLI               | MT            | 6±1           | 6±1.5         | STRAT (Tipaza<br>Eemian Terrace)                | MIS 5           | 2,1                | Authemayou et al., 2017<br>Saoudi, 1989<br>Stearns and Thurber, 1965 |
| 9              | 36.798089<br>2.902117  | Ain Benian<br>Transect AT5     | SLI               | MT            | 8±3           | 8±3.2         | U-series (48)                                   | MIS 5e          | 2,1                | Authemayou et al., 2017<br>Saoudi, 1989<br>Stearns and Thurber, 1965 |
|                |                        |                                |                   |               |               |               | STRAT (Tipaza<br>Eemian Terrace)                | MIS 5           |                    |                                                                      |
| 11             | 35.866385<br>-0.298541 | Arzew                          | SLI               | MT            | 38±10         | 38±10.1       | STRAT ( <i>P. latus</i> or<br>Senegalese fauna) | MIS 5           | 1,1                | Meghraoui et al., 1996                                               |
| 12             | 35.574939<br>-1.180597 | Cap Figalo                     | SLI               | MT            | 45±10         | 45±10.1       | STRAT ( <i>P. latus</i> or<br>Senegalese fauna) | MIS 5           | 1,1                | Meghraoui et al., 1996                                               |
| <b>Morocco</b> |                        |                                |                   |               |               |               |                                                 |                 |                    |                                                                      |
| 3599           | 35.828994<br>-5.715446 | Hejar Lasfar marine<br>terrace | SLI               | MT            | 13.5±2.7      | 13±3.4        | U-series (S2-DC)                                | 106.8±3.3       | 3,4                | El Abdellaoui et al., 2016                                           |
|                |                        |                                |                   |               |               |               | U-series (S2-FC)                                | 96.6±2.3        |                    |                                                                      |
|                |                        |                                |                   |               |               |               | U-series (S3-C1)                                | 111.2±2         |                    |                                                                      |
|                |                        |                                |                   |               |               |               | U-series (S3-C2)                                | 119.6±2.3       |                    |                                                                      |
| 248            | 35.83079<br>-5.64211   | Dhada marine terrace<br>S2     | SLI               | MT            | 14±2.8        | 13.4±3.5      | U-series (S2-DC)                                | 106.8±3.3       | 3,1                | El Abdellaoui et al., 2016                                           |
|                |                        |                                |                   |               |               |               | U-series (S2-FC)                                | 96.6±2.3        |                    |                                                                      |
| 249            | 35.8312<br>-5.641645   | Dhada marine terrace<br>S3     | SLI               | MT            | 14±2.8        | 13.4±3.5      | U-series (S3-C1)                                | 111.2±2         | 3,5                | El Abdellaoui et al., 2016                                           |
|                |                        |                                |                   |               |               |               | U-series (S3-C2)                                | 119.6±2.3       |                    |                                                                      |
| 3598           | 35.868426<br>-5.511586 | Zhâra marine terrace           | SLI               | MT            | 13.5±2.7      | 13±3.4        | U-series (S2-DC)                                | 106.8±3.3       | 3,4                | El Abdellaoui et al., 2016                                           |
|                |                        |                                |                   |               |               |               | U-series (S2-FC)                                | 96.6±2.3        |                    |                                                                      |
|                |                        |                                |                   |               |               |               | U-series (S3-C1)                                | 111.2±2         |                    |                                                                      |
|                |                        |                                |                   |               |               |               | U-series (S3-C2)                                | 119.6±2.3       |                    |                                                                      |
| 260            | 35.910136<br>-5.414401 | Cape Leona<br>Section C        | SLI               | NTC           | 10.5±2.3      | 10.5±2.3      | U-series (MABE1005)                             | 84.4±3.3        | 3,3                | Abad et al., 2013                                                    |
| 259            | 35.910333<br>-5.385481 | Bel Younech Beach<br>Section A | MLI               |               | 14.3±3.3      |               | U-series (MABE0604)                             | 131.2±7.4       | 0,1                | Abad et al., 2013                                                    |
|                |                        |                                |                   |               |               |               | U-series (MABE0603)                             | 87±3.7          |                    |                                                                      |
| 4073           | 35.537777<br>-5.215318 | Laskrine                       | SLI               | MT            | 6±1.2         | 5.8±1.5       | U-series (MA-16)                                | 130±39          | 2,4                | Brückner, 1986                                                       |
|                |                        |                                |                   |               |               |               | LUM (MA-17)                                     | 128.3±19.2      |                    |                                                                      |

| WALIS ID | Latitude Longitude     | Site                    | Type of datapoint | RSL Indicator | Elevation (m) | Paleo RSL (m) | Dating (Original ID)                         | Age (ka or MIS) | Quality (RSL, Age) | Reference(s)        |
|----------|------------------------|-------------------------|-------------------|---------------|---------------|---------------|----------------------------------------------|-----------------|--------------------|---------------------|
| 4074     | 35.514598<br>-5.159386 | Aouchtame               | SLI               | MT            | 4±0.8         | 3.8±1.2       | U-series (MA-13)                             | 87-100          | 2,3                | Brückner, 1986      |
|          |                        |                         |                   |               |               |               | U-series (MA-13b)                            | 73-82           |                    |                     |
| 929      | 35.255483<br>-3.92068  | Al Hoceima              | MLI               |               | 2±0.4         |               | AAR (46)                                     | MIS 5e          | 0,4                | Hearty, 1986b       |
|          |                        |                         |                   |               |               |               | STRAT ( <i>P. latus</i> or Senegalese fauna) | MIS 5           |                    |                     |
| 3622     | 35.281955<br>-3.706314 | Rastarf Cape Al-Hoceima | SLI               | MT            | 22±1          | 22±1.5        | U-series (Co1)                               | <213±63.9       | 3,2                | Poujol et al., 2014 |
|          |                        |                         |                   |               |               |               | U-series (Co2)                               | <207±62.1       |                    |                     |
|          |                        |                         |                   |               |               |               | U-series (S1)                                | <203+34/-27     |                    |                     |
|          |                        |                         |                   |               |               |               | U-series (S2)                                | <186+20/-18     |                    |                     |
| 4075     | 35.204607<br>-3.30254  | Beni Said               | SLI               | MT            | 5±1           | 5±1.5         | STRAT ( <i>P. latus</i> or Senegalese fauna) | MIS 5           | 2,3                | Brückner, 1986      |
| 4076     | 35.227333<br>-3.211035 | Ifri Ifounassene        | SLI               | MT            | 5±1           | 5±1.5         | U-series (MA-1b)                             | 72-83           | 2,4                | Brückner, 1986      |
|          |                        |                         |                   |               |               |               | ESR (MA1a)                                   | 94.3±18.9       |                    |                     |
|          |                        |                         |                   |               |               |               | ESR (MA1b)                                   | 133.9±26.8      |                    |                     |
|          |                        |                         |                   |               |               |               | STRAT ( <i>P. latus</i> or Senegalese fauna) | MIS 5           |                    |                     |
| 4077     | 35.226628<br>-3.209835 | Ifri Ifounassene (II)   | SLI               | MT            | 3.8±0.8       | 3.7±1.4       | U-series (MA-2a)                             | 65-81           | 2,3                | Brückner, 1986      |
|          |                        |                         |                   |               |               |               | U-series (MA-2b)                             | 62-70           |                    |                     |
| 4078     | 35.225917<br>-3.209594 | Ifri Ifounassene (III)  | SLI               | MT            | 5±1           | 5±1.5         | U-series (MA-3b)                             | 93-118          | 2,4                | Brückner, 1986      |
|          |                        |                         |                   |               |               |               | ESR (MA-3a)                                  | 140.4±28.1      |                    |                     |
|          |                        |                         |                   |               |               |               | ESR (MA-3b)                                  | 114.8±23        |                    |                     |
